# Supplementary material
Source: publisher site journal article supplement (https://www.dovepress.com/get_supplementary_file.php?f=156003a.xlsx)
Supplement: Supplementary file 1 [file get_supplementary_file.php]

## Sheet: Table S1
NAME	GS<br> follow link to MSigDB	GS DETAILS	SIZE	ES	NES	NOM p-val	FDR q-val	FWER p-val	RANK AT MAX	LEADING EDGE
HEMOSTASIS	HEMOSTASIS	Details ...	45	0.523597	1.90368	0	0.101419	0.223	8552	tags=51%, list=23%, signal=66%
METAL_ION_TRANSPORT	METAL_ION_TRANSPORT	Details ...	105	0.412098	1.83648	0	0.103273	0.32	9452	tags=45%, list=25%, signal=60%
REGULATION_OF_CELL_DIFFERENTIATION	REGULATION_OF_CELL_DIFFERENTIATION	Details ...	54	0.437875	1.85988	0	0.111548	0.284	5802	tags=33%, list=15%, signal=39%
POTASSIUM_ION_TRANSPORT	POTASSIUM_ION_TRANSPORT	Details ...	52	0.501176	1.96965	0	0.11392	0.148	6272	tags=38%, list=17%, signal=46%
REGULATION_OF_BIOLOGICAL_QUALITY	REGULATION_OF_BIOLOGICAL_QUALITY	Details ...	392	0.377007	1.76562	0	0.114465	0.417	10148	tags=44%, list=27%, signal=59%
GENERATION_OF_A_SIGNAL_INVOLVED_IN_CELL_CELL_SIGNALING	GENERATION_OF_A_SIGNAL_INVOLVED_IN_CELL_CELL_SIGNALING	Details ...	27	0.500048	1.86227	0	0.114866	0.281	5785	tags=37%, list=15%, signal=44%
ANATOMICAL_STRUCTURE_MORPHOGENESIS	ANATOMICAL_STRUCTURE_MORPHOGENESIS	Details ...	345	0.35048	1.76899	0	0.117383	0.411	9634	tags=41%, list=26%, signal=55%
REPRODUCTION	REPRODUCTION	Details ...	211	0.386814	1.86575	0	0.118215	0.28	8983	tags=41%, list=24%, signal=53%
MYELOID_CELL_DIFFERENTIATION	MYELOID_CELL_DIFFERENTIATION	Details ...	35	0.539597	1.92461	0	0.119082	0.197	3446	tags=31%, list=9%, signal=35%
REGULATION_OF_MYELOID_CELL_DIFFERENTIATION	REGULATION_OF_MYELOID_CELL_DIFFERENTIATION	Details ...	18	0.66095	2.11053	0	0.124977	0.037	3446	tags=39%, list=9%, signal=43%
WOUND_HEALING	WOUND_HEALING	Details ...	48	0.530074	1.97307	0	0.127537	0.144	7167	tags=46%, list=19%, signal=57%
MONOVALENT_INORGANIC_CATION_TRANSPORT	MONOVALENT_INORGANIC_CATION_TRANSPORT	Details ...	84	0.406167	1.70269	0	0.137997	0.521	11412	tags=48%, list=30%, signal=68%
HOMEOSTATIC_PROCESS	HOMEOSTATIC_PROCESS	Details ...	192	0.366202	1.69667	0	0.140441	0.525	6971	tags=31%, list=18%, signal=38%
REPRODUCTIVE_PROCESS	REPRODUCTIVE_PROCESS	Details ...	126	0.405913	1.97764	0	0.145247	0.142	11834	tags=52%, list=31%, signal=75%
SYSTEM_PROCESS	SYSTEM_PROCESS	Details ...	492	0.313664	1.64485	0	0.1546	0.606	9365	tags=34%, list=25%, signal=44%
CELL_CELL_SIGNALING	CELL_CELL_SIGNALING	Details ...	354	0.316873	1.63984	0	0.155396	0.619	7665	tags=31%, list=20%, signal=38%
CELL_PROLIFERATION_GO_0008283	CELL_PROLIFERATION_GO_0008283	Details ...	477	0.339776	1.64788	0	0.156464	0.602	8304	tags=35%, list=22%, signal=44%
NEGATIVE_REGULATION_OF_CELL_PROLIFERATION	NEGATIVE_REGULATION_OF_CELL_PROLIFERATION	Details ...	140	0.344555	1.58291	0	0.169246	0.693	9406	tags=42%, list=25%, signal=56%
REGULATION_OF_MULTICELLULAR_ORGANISMAL_PROCESS	REGULATION_OF_MULTICELLULAR_ORGANISMAL_PROCESS	Details ...	136	0.452705	1.9824	0	0.169422	0.137	7741	tags=40%, list=21%, signal=50%
BLOOD_COAGULATION	BLOOD_COAGULATION	Details ...	40	0.554289	1.98394	0	0.222607	0.136	7167	tags=48%, list=19%, signal=59%
HOMEOSTASIS_OF_NUMBER_OF_CELLS	HOMEOSTASIS_OF_NUMBER_OF_CELLS	Details ...	20	0.637165	1.91456	0.00271739	0.119103	0.207	4083	tags=45%, list=11%, signal=50%
TRANSMEMBRANE_RECEPTOR_PROTEIN_SERINE_THREONINE_KINASE_SIGNALING_PATHWAY	TRANSMEMBRANE_RECEPTOR_PROTEIN_SERINE_THREONINE_KINASE_SIGNALING_PATHWAY	Details ...	43	0.475357	1.80486	0.0027933	0.105246	0.354	5994	tags=37%, list=16%, signal=44%
NEGATIVE_REGULATION_OF_TRANSLATION	NEGATIVE_REGULATION_OF_TRANSLATION	Details ...	23	0.527507	1.72642	0.0027933	0.136144	0.484	7248	tags=57%, list=19%, signal=70%
LIPID_TRANSPORT	LIPID_TRANSPORT	Details ...	26	0.572123	1.81377	0.00293255	0.105668	0.349	5252	tags=31%, list=14%, signal=36%
REGULATION_OF_HEART_CONTRACTION	REGULATION_OF_HEART_CONTRACTION	Details ...	23	0.589763	1.95989	0.00310559	0.0971005	0.159	9365	tags=52%, list=25%, signal=69%
COAGULATION	COAGULATION	Details ...	41	0.543338	1.96579	0.00318471	0.103947	0.152	7167	tags=46%, list=19%, signal=57%
HOMOPHILIC_CELL_ADHESION	HOMOPHILIC_CELL_ADHESION	Details ...	16	0.608124	1.84418	0.00326797	0.101428	0.31	11747	tags=75%, list=31%, signal=109%
REGULATION_OF_BODY_FLUID_LEVELS	REGULATION_OF_BODY_FLUID_LEVELS	Details ...	53	0.486831	1.85527	0.00327869	0.111046	0.287	7167	tags=45%, list=19%, signal=56%
TRANSMEMBRANE_RECEPTOR_PROTEIN_TYROSINE_KINASE_SIGNALING_PATHWAY	TRANSMEMBRANE_RECEPTOR_PROTEIN_TYROSINE_KINASE_SIGNALING_PATHWAY	Details ...	81	0.38742	1.66974	0.00331126	0.150369	0.563	9104	tags=44%, list=24%, signal=58%
ENZYME_LINKED_RECEPTOR_PROTEIN_SIGNALING_PATHWAY	ENZYME_LINKED_RECEPTOR_PROTEIN_SIGNALING_PATHWAY	Details ...	134	0.391935	1.76817	0.0034965	0.115347	0.414	8297	tags=40%, list=22%, signal=51%
FEMALE_PREGNANCY	FEMALE_PREGNANCY	Details ...	37	0.471321	1.81639	0.00350877	0.11214	0.343	10964	tags=57%, list=29%, signal=80%
CELL_CELL_ADHESION	CELL_CELL_ADHESION	Details ...	76	0.443136	1.84424	0.003663	0.105747	0.31	10629	tags=55%, list=28%, signal=77%
CHEMICAL_HOMEOSTASIS	CHEMICAL_HOMEOSTASIS	Details ...	143	0.366658	1.63826	0.00404858	0.154457	0.619	6971	tags=32%, list=18%, signal=39%
EMBRYONIC_DEVELOPMENT	EMBRYONIC_DEVELOPMENT	Details ...	51	0.390115	1.60668	0.00408163	0.162481	0.658	7962	tags=43%, list=21%, signal=55%
MAINTENANCE_OF_LOCALIZATION	MAINTENANCE_OF_LOCALIZATION	Details ...	21	0.579948	1.82382	0.005291	0.109562	0.333	5092	tags=43%, list=13%, signal=50%
REGULATION_OF_T_CELL_ACTIVATION	REGULATION_OF_T_CELL_ACTIVATION	Details ...	27	0.578493	1.81495	0.00555556	0.108716	0.345	5619	tags=41%, list=15%, signal=48%
LEUKOCYTE_DIFFERENTIATION	LEUKOCYTE_DIFFERENTIATION	Details ...	35	0.521389	1.85462	0.00557103	0.106348	0.287	9024	tags=46%, list=24%, signal=60%
REGULATION_OF_MUSCLE_CONTRACTION	REGULATION_OF_MUSCLE_CONTRACTION	Details ...	17	0.609912	1.91208	0.0058651	0.1112	0.211	6908	tags=47%, list=18%, signal=58%
HEMOPOIESIS	HEMOPOIESIS	Details ...	71	0.495461	1.8804	0.0058997	0.11867	0.26	6302	tags=34%, list=17%, signal=41%
HEMOPOIETIC_OR_LYMPHOID_ORGAN_DEVELOPMENT	HEMOPOIETIC_OR_LYMPHOID_ORGAN_DEVELOPMENT	Details ...	73	0.474463	1.80842	0.00593472	0.106335	0.353	6302	tags=33%, list=17%, signal=39%
SEXUAL_REPRODUCTION	SEXUAL_REPRODUCTION	Details ...	108	0.39684	1.72265	0.00617284	0.135961	0.488	8983	tags=43%, list=24%, signal=56%
STEROID_HORMONE_RECEPTOR_SIGNALING_PATHWAY	STEROID_HORMONE_RECEPTOR_SIGNALING_PATHWAY	Details ...	20	0.612873	1.80303	0.00668151	0.103803	0.357	2601	tags=40%, list=7%, signal=43%
ORGAN_MORPHOGENESIS	ORGAN_MORPHOGENESIS	Details ...	133	0.332396	1.57924	0.00784314	0.167281	0.698	8422	tags=37%, list=22%, signal=47%
ACTIN_FILAMENT_ORGANIZATION	ACTIN_FILAMENT_ORGANIZATION	Details ...	23	0.60895	1.87572	0.00795756	0.11502	0.263	9304	tags=65%, list=25%, signal=87%
CATION_TRANSPORT	CATION_TRANSPORT	Details ...	133	0.370005	1.65679	0.00843882	0.15447	0.585	9452	tags=41%, list=25%, signal=54%
STEROID_BIOSYNTHETIC_PROCESS	STEROID_BIOSYNTHETIC_PROCESS	Details ...	21	0.617862	1.91035	0.00854701	0.103734	0.212	8098	tags=52%, list=21%, signal=67%
LYMPHOCYTE_DIFFERENTIATION	LYMPHOCYTE_DIFFERENTIATION	Details ...	25	0.565117	1.77738	0.00877193	0.114045	0.393	5619	tags=40%, list=15%, signal=47%
CELLULAR_HOMEOSTASIS	CELLULAR_HOMEOSTASIS	Details ...	134	0.344143	1.53259	0.00877193	0.185533	0.763	6971	tags=31%, list=18%, signal=38%
RESPONSE_TO_HORMONE_STIMULUS	RESPONSE_TO_HORMONE_STIMULUS	Details ...	31	0.474686	1.75217	0.00985222	0.123928	0.442	9270	tags=48%, list=25%, signal=64%
NEGATIVE_REGULATION_OF_RNA_METABOLIC_PROCESS	NEGATIVE_REGULATION_OF_RNA_METABOLIC_PROCESS	Details ...	125	0.374204	1.66712	0.0103093	0.150241	0.57	6774	tags=34%, list=18%, signal=41%
NEGATIVE_REGULATION_OF_TRANSCRIPTION_DNA_DEPENDENT	NEGATIVE_REGULATION_OF_TRANSCRIPTION_DNA_DEPENDENT	Details ...	123	0.374792	1.66497	0.0103359	0.149741	0.573	6774	tags=33%, list=18%, signal=40%
NEGATIVE_REGULATION_OF_TRANSCRIPTION_FROM_RNA_POLYMERASE_II_PROMOTER	NEGATIVE_REGULATION_OF_TRANSCRIPTION_FROM_RNA_POLYMERASE_II_PROMOTER	Details ...	79	0.389338	1.67781	0.0107239	0.153745	0.55	6774	tags=37%, list=18%, signal=45%
NEUROLOGICAL_SYSTEM_PROCESS	NEUROLOGICAL_SYSTEM_PROCESS	Details ...	324	0.285388	1.51181	0.0117647	0.195997	0.788	9344	tags=31%, list=25%, signal=41%
REGULATION_OF_IMMUNE_SYSTEM_PROCESS	REGULATION_OF_IMMUNE_SYSTEM_PROCESS	Details ...	61	0.494273	1.78672	0.0120482	0.109394	0.379	7741	tags=46%, list=21%, signal=58%
NEGATIVE_REGULATION_OF_MULTICELLULAR_ORGANISMAL_PROCESS	NEGATIVE_REGULATION_OF_MULTICELLULAR_ORGANISMAL_PROCESS	Details ...	28	0.4668	1.7091	0.0120482	0.134191	0.514	7519	tags=39%, list=20%, signal=49%
SENSORY_PERCEPTION	SENSORY_PERCEPTION	Details ...	157	0.298441	1.5042	0.0121457	0.192287	0.796	4768	tags=19%, list=13%, signal=22%
ION_HOMEOSTASIS	ION_HOMEOSTASIS	Details ...	120	0.367424	1.59512	0.0125523	0.163426	0.67	6971	tags=33%, list=18%, signal=41%
POSITIVE_REGULATION_OF_T_CELL_ACTIVATION	POSITIVE_REGULATION_OF_T_CELL_ACTIVATION	Details ...	20	0.611312	1.79561	0.0140449	0.105738	0.367	4405	tags=40%, list=12%, signal=45%
CARBOHYDRATE_BIOSYNTHETIC_PROCESS	CARBOHYDRATE_BIOSYNTHETIC_PROCESS	Details ...	47	0.404567	1.5903	0.0142857	0.166135	0.678	4841	tags=32%, list=13%, signal=37%
T_CELL_ACTIVATION	T_CELL_ACTIVATION	Details ...	41	0.569404	1.84621	0.0143266	0.109199	0.307	7939	tags=49%, list=21%, signal=62%
STEROID_METABOLIC_PROCESS	STEROID_METABOLIC_PROCESS	Details ...	63	0.402481	1.61765	0.0153374	0.163891	0.645	5690	tags=32%, list=15%, signal=37%
ION_TRANSPORT	ION_TRANSPORT	Details ...	169	0.339597	1.57718	0.0172414	0.167856	0.703	9452	tags=38%, list=25%, signal=51%
TRANSFORMING_GROWTH_FACTOR_BETA_RECEPTOR_SIGNALING_PATHWAY	TRANSFORMING_GROWTH_FACTOR_BETA_RECEPTOR_SIGNALING_PATHWAY	Details ...	34	0.459828	1.67499	0.0174927	0.150911	0.552	5994	tags=35%, list=16%, signal=42%
TISSUE_DEVELOPMENT	TISSUE_DEVELOPMENT	Details ...	111	0.329166	1.55703	0.0176211	0.176698	0.722	11682	tags=49%, list=31%, signal=70%
CYTOSKELETON_DEPENDENT_INTRACELLULAR_TRANSPORT	CYTOSKELETON_DEPENDENT_INTRACELLULAR_TRANSPORT	Details ...	26	0.533258	1.7194	0.0178042	0.132835	0.492	7020	tags=50%, list=19%, signal=61%
MULTI_ORGANISM_PROCESS	MULTI_ORGANISM_PROCESS	Details ...	127	0.379877	1.6361	0.0179211	0.151727	0.621	9871	tags=42%, list=26%, signal=56%
CENTRAL_NERVOUS_SYSTEM_DEVELOPMENT	CENTRAL_NERVOUS_SYSTEM_DEVELOPMENT	Details ...	109	0.33984	1.60959	0.0180505	0.163766	0.652	9559	tags=39%, list=25%, signal=53%
CATION_HOMEOSTASIS	CATION_HOMEOSTASIS	Details ...	100	0.375449	1.59994	0.018315	0.164974	0.664	8007	tags=38%, list=21%, signal=48%
G_PROTEIN_COUPLED_RECEPTOR_PROTEIN_SIGNALING_PATHWAY	G_PROTEIN_COUPLED_RECEPTOR_PROTEIN_SIGNALING_PATHWAY	Details ...	283	0.290938	1.4291	0.0183486	0.2111	0.866	9978	tags=37%, list=26%, signal=50%
IMMUNE_SYSTEM_DEVELOPMENT	IMMUNE_SYSTEM_DEVELOPMENT	Details ...	77	0.455124	1.74037	0.0184049	0.129123	0.462	3446	tags=26%, list=9%, signal=29%
NEGATIVE_REGULATION_OF_BIOSYNTHETIC_PROCESS	NEGATIVE_REGULATION_OF_BIOSYNTHETIC_PROCESS	Details ...	29	0.449809	1.60914	0.0192308	0.161951	0.652	7248	tags=52%, list=19%, signal=64%
HORMONE_SECRETION	HORMONE_SECRETION	Details ...	16	0.5359	1.69447	0.019802	0.140127	0.527	5785	tags=38%, list=15%, signal=44%
INTRACELLULAR_RECEPTOR_MEDIATED_SIGNALING_PATHWAY	INTRACELLULAR_RECEPTOR_MEDIATED_SIGNALING_PATHWAY	Details ...	21	0.58113	1.72881	0.02	0.137216	0.481	2601	tags=38%, list=7%, signal=41%
REGULATION_OF_CELL_PROLIFERATION	REGULATION_OF_CELL_PROLIFERATION	Details ...	284	0.302932	1.48994	0.0210526	0.192487	0.812	8304	tags=33%, list=22%, signal=42%
SECRETION	SECRETION	Details ...	168	0.351122	1.56589	0.0222222	0.174636	0.714	9893	tags=41%, list=26%, signal=55%
PROTEIN_AMINO_ACID_N_LINKED_GLYCOSYLATION	PROTEIN_AMINO_ACID_N_LINKED_GLYCOSYLATION	Details ...	28	0.466618	1.62642	0.0234375	0.157613	0.633	4543	tags=32%, list=12%, signal=37%
EXOCYTOSIS	EXOCYTOSIS	Details ...	24	0.457554	1.60282	0.0238095	0.164286	0.661	7750	tags=42%, list=21%, signal=52%
NERVOUS_SYSTEM_DEVELOPMENT	NERVOUS_SYSTEM_DEVELOPMENT	Details ...	346	0.302413	1.50849	0.0238095	0.19595	0.791	7995	tags=30%, list=21%, signal=38%
DI__TRI_VALENT_INORGANIC_CATION_TRANSPORT	DI__TRI_VALENT_INORGANIC_CATION_TRANSPORT	Details ...	29	0.440071	1.63773	0.0239726	0.152562	0.619	7040	tags=38%, list=19%, signal=47%
TRANSMISSION_OF_NERVE_IMPULSE	TRANSMISSION_OF_NERVE_IMPULSE	Details ...	167	0.299825	1.48563	0.0242424	0.191247	0.814	7665	tags=29%, list=20%, signal=36%
EXCRETION	EXCRETION	Details ...	33	0.404738	1.5373	0.0257235	0.182029	0.754	8418	tags=42%, list=22%, signal=55%
NEGATIVE_REGULATION_OF_CELLULAR_PROTEIN_METABOLIC_PROCESS	NEGATIVE_REGULATION_OF_CELLULAR_PROTEIN_METABOLIC_PROCESS	Details ...	45	0.411022	1.55567	0.026393	0.176302	0.724	7279	tags=42%, list=19%, signal=52%
MESODERM_DEVELOPMENT	MESODERM_DEVELOPMENT	Details ...	21	0.464024	1.58426	0.0265781	0.169767	0.691	5645	tags=29%, list=15%, signal=34%
REGULATION_OF_PROTEIN_KINASE_ACTIVITY	REGULATION_OF_PROTEIN_KINASE_ACTIVITY	Details ...	146	0.341826	1.51493	0.0271903	0.197975	0.786	8460	tags=38%, list=22%, signal=48%
RESPONSE_TO_DRUG	RESPONSE_TO_DRUG	Details ...	20	0.5748	1.72236	0.0282051	0.13319	0.488	8424	tags=55%, list=22%, signal=71%
POSITIVE_REGULATION_OF_MULTICELLULAR_ORGANISMAL_PROCESS	POSITIVE_REGULATION_OF_MULTICELLULAR_ORGANISMAL_PROCESS	Details ...	61	0.464541	1.70928	0.0292208	0.136775	0.514	7741	tags=43%, list=21%, signal=54%
REGULATION_OF_LYMPHOCYTE_ACTIVATION	REGULATION_OF_LYMPHOCYTE_ACTIVATION	Details ...	34	0.499153	1.67304	0.0292398	0.150387	0.557	7519	tags=44%, list=20%, signal=55%
RESPONSE_TO_HYPOXIA	RESPONSE_TO_HYPOXIA	Details ...	28	0.472066	1.64494	0.0294906	0.156807	0.606	10444	tags=61%, list=28%, signal=84%
ONE_CARBON_COMPOUND_METABOLIC_PROCESS	ONE_CARBON_COMPOUND_METABOLIC_PROCESS	Details ...	26	0.562232	1.7141	0.029661	0.135063	0.504	9764	tags=58%, list=26%, signal=78%
CELLULAR_CATION_HOMEOSTASIS	CELLULAR_CATION_HOMEOSTASIS	Details ...	97	0.370442	1.56316	0.0301887	0.175373	0.717	8007	tags=38%, list=21%, signal=48%
PROTEIN_IMPORT	PROTEIN_IMPORT	Details ...	62	0.421019	1.59933	0.030303	0.161461	0.664	6615	tags=35%, list=18%, signal=43%
CELL_ACTIVATION	CELL_ACTIVATION	Details ...	71	0.443572	1.65241	0.0309598	0.156643	0.592	4405	tags=31%, list=12%, signal=35%
TUBE_DEVELOPMENT	TUBE_DEVELOPMENT	Details ...	16	0.554975	1.63987	0.0311526	0.157732	0.619	4228	tags=38%, list=11%, signal=42%
REGULATION_OF_KINASE_ACTIVITY	REGULATION_OF_KINASE_ACTIVITY	Details ...	148	0.337053	1.50104	0.0324484	0.193942	0.801	8460	tags=37%, list=22%, signal=48%
LYMPHOCYTE_ACTIVATION	LYMPHOCYTE_ACTIVATION	Details ...	58	0.493885	1.74295	0.0328358	0.129705	0.457	7939	tags=45%, list=21%, signal=57%
NEGATIVE_REGULATION_OF_CELLULAR_METABOLIC_PROCESS	NEGATIVE_REGULATION_OF_CELLULAR_METABOLIC_PROCESS	Details ...	251	0.318121	1.49455	0.0329341	0.19405	0.805	8396	tags=35%, list=22%, signal=44%
CELL_STRUCTURE_DISASSEMBLY_DURING_APOPTOSIS	CELL_STRUCTURE_DISASSEMBLY_DURING_APOPTOSIS	Details ...	17	0.550386	1.67565	0.032967	0.152903	0.552	9413	tags=65%, list=25%, signal=86%
GAMETE_GENERATION	GAMETE_GENERATION	Details ...	91	0.375406	1.54686	0.0332326	0.181201	0.738	8983	tags=44%, list=24%, signal=58%
PROTEIN_IMPORT_INTO_NUCLEUS	PROTEIN_IMPORT_INTO_NUCLEUS	Details ...	48	0.415234	1.54603	0.0332481	0.180389	0.74	6576	tags=35%, list=17%, signal=43%
DETECTION_OF_STIMULUS	DETECTION_OF_STIMULUS	Details ...	40	0.379625	1.50654	0.0337838	0.193045	0.794	5551	tags=28%, list=15%, signal=32%
SECONDARY_METABOLIC_PROCESS	SECONDARY_METABOLIC_PROCESS	Details ...	25	0.539753	1.62695	0.0338542	0.159194	0.632	5542	tags=44%, list=15%, signal=52%
DETECTION_OF_STIMULUS_INVOLVED_IN_SENSORY_PERCEPTION	DETECTION_OF_STIMULUS_INVOLVED_IN_SENSORY_PERCEPTION	Details ...	17	0.450945	1.51601	0.034384	0.198445	0.783	4717	tags=29%, list=12%, signal=34%
NEGATIVE_REGULATION_OF_TRANSCRIPTION	NEGATIVE_REGULATION_OF_TRANSCRIPTION	Details ...	181	0.329771	1.50735	0.0344828	0.193751	0.793	8396	tags=35%, list=22%, signal=45%
GLYCOLIPID_METABOLIC_PROCESS	GLYCOLIPID_METABOLIC_PROCESS	Details ...	16	0.515232	1.61446	0.0348525	0.161866	0.646	2673	tags=31%, list=7%, signal=34%
AMINE_TRANSPORT	AMINE_TRANSPORT	Details ...	36	0.399052	1.51351	0.0358306	0.197777	0.786	2123	tags=22%, list=6%, signal=24%
NEGATIVE_REGULATION_OF_METABOLIC_PROCESS	NEGATIVE_REGULATION_OF_METABOLIC_PROCESS	Details ...	252	0.317886	1.48599	0.0361446	0.192133	0.814	8396	tags=35%, list=22%, signal=44%
ACTIN_POLYMERIZATION_AND_OR_DEPOLYMERIZATION	ACTIN_POLYMERIZATION_AND_OR_DEPOLYMERIZATION	Details ...	23	0.487129	1.55722	0.039801	0.178468	0.722	3552	tags=30%, list=9%, signal=34%
NUCLEAR_ORGANIZATION_AND_BIOGENESIS	NUCLEAR_ORGANIZATION_AND_BIOGENESIS	Details ...	27	0.477047	1.58289	0.040404	0.167326	0.693	9413	tags=56%, list=25%, signal=74%
CYTOSKELETON_ORGANIZATION_AND_BIOGENESIS	CYTOSKELETON_ORGANIZATION_AND_BIOGENESIS	Details ...	201	0.358709	1.50744	0.0404624	0.195381	0.793	7805	tags=35%, list=21%, signal=44%
NEGATIVE_REGULATION_OF_PROTEIN_METABOLIC_PROCESS	NEGATIVE_REGULATION_OF_PROTEIN_METABOLIC_PROCESS	Details ...	47	0.391146	1.51213	0.0406977	0.197384	0.788	7279	tags=40%, list=19%, signal=50%
SYNAPTIC_TRANSMISSION	SYNAPTIC_TRANSMISSION	Details ...	153	0.276719	1.38742	0.0416667	0.228801	0.897	7665	tags=27%, list=20%, signal=34%
POSITIVE_REGULATION_OF_CELL_DIFFERENTIATION	POSITIVE_REGULATION_OF_CELL_DIFFERENTIATION	Details ...	21	0.500116	1.59962	0.0424242	0.163183	0.664	3112	tags=33%, list=8%, signal=36%
HORMONE_METABOLIC_PROCESS	HORMONE_METABOLIC_PROCESS	Details ...	28	0.430677	1.56628	0.0443213	0.176137	0.714	4625	tags=32%, list=12%, signal=37%
LEUKOCYTE_ACTIVATION	LEUKOCYTE_ACTIVATION	Details ...	64	0.451603	1.64872	0.0443787	0.15806	0.602	4405	tags=31%, list=12%, signal=35%
REGULATION_OF_TRANSFERASE_ACTIVITY	REGULATION_OF_TRANSFERASE_ACTIVITY	Details ...	152	0.332362	1.48164	0.0443787	0.193356	0.815	8460	tags=37%, list=22%, signal=47%
NEGATIVE_REGULATION_OF_CELLULAR_BIOSYNTHETIC_PROCESS	NEGATIVE_REGULATION_OF_CELLULAR_BIOSYNTHETIC_PROCESS	Details ...	28	0.430023	1.51066	0.0453333	0.195509	0.79	7248	tags=50%, list=19%, signal=62%
ALCOHOL_METABOLIC_PROCESS	ALCOHOL_METABOLIC_PROCESS	Details ...	83	0.363151	1.49911	0.0470914	0.192623	0.803	8608	tags=36%, list=23%, signal=47%
ACTIN_FILAMENT_BASED_PROCESS	ACTIN_FILAMENT_BASED_PROCESS	Details ...	113	0.390629	1.58152	0.0472222	0.166928	0.696	8606	tags=42%, list=23%, signal=54%
PROTEIN_AUTOPROCESSING	PROTEIN_AUTOPROCESSING	Details ...	31	0.432684	1.50575	0.0477387	0.192303	0.795	6399	tags=35%, list=17%, signal=43%
PROTEIN_TARGETING	PROTEIN_TARGETING	Details ...	109	0.395749	1.54579	0.0494792	0.178756	0.74	6773	tags=38%, list=18%, signal=46%

## Sheet: Table S2
Gene ID	logFC	logCPM	PValue	FDR
WNK3	6.66179	2.36127	3.92279e-126	1.48046e-121
COL20A1	5.96831	0.310403	1.17345e-85	2.2143e-81
COL6A6	5.12804	1.51423	1.41014e-77	1.77395e-73
LINC00839	7.06138	-1.26424	6.00995e-73	5.14983e-69
PRSS2	7.96763	4.15537	6.82278e-73	5.14983e-69
C1orf95	5.21733	1.39599	2.47168e-67	1.55468e-63
CDH6	7.11517	2.09928	1.5143e-64	8.16422e-61
EPHA5	9.19339	-0.322979	3.9101e-64	1.84459e-60
MYO16	5.53105	0.817622	4.78775e-61	2.00766e-57
POF1B	5.88231	-0.241794	3.35729e-57	1.26704e-53
RYR3	3.84996	4.31968	7.09875e-56	2.43552e-52
RP11-98O2.1	5.64397	-0.672848	2.32091e-55	7.29927e-52
HPSE2	6.66567	-0.323109	3.6211e-54	1.05123e-50
TNK1	3.57503	2.37334	3.74275e-52	1.00894e-48
EPHA3	6.78306	0.28706	7.32547e-52	1.84309e-48
NPY2R	9.72477	-0.666049	3.30527e-51	7.79631e-48
B3GALT5	6.56958	-0.398674	5.18169e-50	1.15034e-46
PROX1	5.71006	-1.23134	3.99552e-49	8.37727e-46
DGKI	4.39515	-1.10569	1.74818e-47	3.47243e-44
CDO1	5.68559	-0.21701	4.5524e-47	8.59039e-44
HCN1	7.74113	-1.8762	5.08509e-46	9.13864e-43
MAOB	5.84044	0.310676	7.54041e-46	1.29352e-42
GABRG2	7.64819	-2.16497	2.08465e-45	3.42064e-42
RP11-599B13.9	4.91085	-1.4483	4.25429e-45	6.68987e-42
OSBPL6	5.06318	1.42617	9.67248e-45	1.44679e-41
IGKV2OR22-4	5.14003	-0.972055	9.96727e-45	1.44679e-41
FHL2	3.61527	2.56361	5.191e-44	7.25587e-41
ST6GALNAC5	5.87074	-1.46067	4.59661e-43	6.19558e-40
KCNK1	7.01316	0.709382	1.45398e-42	1.89218e-39
ATP13A4	3.72482	1.56098	2.30567e-42	2.90053e-39
SLC10A4	3.94275	-0.10727	6.84937e-41	8.33856e-38
COL25A1	4.54331	-0.0865549	1.42698e-39	1.68295e-36
RP11-489D6.2	6.61587	-1.73108	1.55444e-39	1.77771e-36
ADAMTS19	6.12444	-2.21614	3.01216e-39	3.34349e-36
NCKAP1	4.06361	1.99606	2.2832e-38	2.46194e-35
CHST8	4.97379	-1.50699	9.83682e-38	1.03123e-34
RP11-318G21.4	6.7288	-2.29748	1.18956e-37	1.21335e-34
RP11-445O3.3	5.98183	-2.46761	1.91494e-37	1.90184e-34
NTN4	4.4839	-0.330581	4.0546e-37	3.92361e-34
RP11-25H12.1	6.69904	-3.02557	4.29058e-37	4.04817e-34
PCSK1N	4.32393	-1.36693	1.15367e-36	1.06194e-33
PAPPA-AS2	7.00404	-1.9637	1.45001e-36	1.30294e-33
DBX2	6.85351	-2.34241	1.75084e-36	1.53667e-33
CCNYL2	5.54664	-2.58994	5.06124e-36	4.34116e-33
CTD-3046C4.1	6.56514	-2.83015	1.18152e-35	9.90898e-33
RELN	5.0317	0.431633	5.57137e-35	4.57094e-32
MAGI1	5.09485	0.736413	1.61789e-34	1.29913e-31
AC012360.6	3.74489	-0.899333	1.99231e-34	1.56645e-31
GABRA1	6.50647	-2.40641	3.52202e-34	2.71267e-31
RNF182	5.76608	0.835398	5.88938e-34	4.4453e-31
AC006548.28	3.98135	1.17612	9.13813e-34	6.76221e-31
GPR1-AS	4.08112	-2.08	2.02617e-33	1.47053e-30
RP13-726E6.2	3.62391	-0.616379	3.87466e-33	2.75905e-30
RP11-119D18.1	7.79217	-2.38002	4.68579e-33	3.27484e-30
ACSBG1	3.25134	1.73984	7.57106e-33	5.19512e-30
ALOX12B	3.74098	-0.344	2.53116e-32	1.70582e-29
AKAP8P1	6.20751	-3.1574	7.74281e-32	5.12656e-29
RYR2	5.3577	1.34682	9.79379e-32	6.37272e-29
CASR	4.34644	-2.0735	4.26395e-31	2.70985e-28
ACE2	4.38246	-2.0571	4.30819e-31	2.70985e-28
GCKR	4.06754	-1.94427	5.02236e-31	3.10728e-28
NMU	5.22788	0.74457	8.56851e-31	5.21573e-28
RP11-166A12.1	5.82027	-2.52576	1.11188e-30	6.66068e-28
ALOXE3	3.78977	-2.14829	1.93605e-30	1.12638e-27
CSF1	3.29599	4.15684	1.93998e-30	1.12638e-27
COL6A5	5.4481	1.49449	2.06411e-30	1.1803e-27
LONRF2	3.86736	0.653486	3.88625e-30	2.18906e-27
GAD1	4.11268	1.59419	9.90285e-30	5.49608e-27
ASIC4	3.77196	-0.952167	1.64335e-29	8.98839e-27
RP11-92A5.2	7.56067	-2.45323	1.79235e-29	9.6633e-27
ROR1	4.93674	-0.560361	1.93647e-29	1.02933e-26
KRT79	5.51608	-1.61865	2.51037e-29	1.31585e-26
SLC9A2	3.41554	-1.60742	5.09538e-29	2.63424e-26
AP001891.1	5.40491	-3.32287	6.35654e-29	3.24184e-26
SLC13A3	3.45759	-0.421596	1.23881e-28	6.23371e-26
KCNT2	4.88592	-0.925157	2.24966e-28	1.11713e-25
RP11-453D16.2	5.0814	-2.80636	2.48527e-28	1.2181e-25
RPL7AP71	3.77538	-2.77981	3.26173e-28	1.57817e-25
ENPP7P8	3.2103	-1.21359	4.15073e-28	1.98289e-25
CYP4F32P	5.86682	-3.30168	5.32386e-28	2.51153e-25
PQLC2L	4.76285	-3.0062	2.07187e-27	9.65336e-25
CNRIP1	3.46228	3.97119	2.26466e-27	1.0423e-24
PRELP	3.86701	-1.02358	3.86566e-27	1.75771e-24
SLC5A12	6.7359	-1.46985	4.4982e-27	2.02097e-24
ZNF728	3.64145	-2.58147	6.37906e-27	2.8323e-24
IGFL2	4.90565	-2.77222	7.69867e-27	3.37846e-24
ZDBF2	3.28198	1.46197	1.1709e-26	5.07929e-24
CFHR3	5.48107	-1.838	1.54089e-26	6.60831e-24
CACNA2D1	4.50675	-0.760689	1.78846e-26	7.58386e-24
PAPPA	4.01554	1.11927	3.42363e-26	1.43564e-23
RP11-642D6.1	3.5569	-0.37446	3.55719e-26	1.47526e-23
TEK	3.50788	1.26424	4.59264e-26	1.88398e-23
RP11-80I3.1	5.06498	-2.3514	5.79783e-26	2.3528e-23
RPS24P14	3.86417	-3.06441	7.30674e-26	2.90508e-23
ARGFXP1	5.8069	-3.21739	7.31275e-26	2.90508e-23
LAMA2	2.97482	-0.100371	7.9872e-26	3.13997e-23
RP11-167J8.3	4.33091	-2.46239	1.39649e-25	5.43334e-23
HAS1	3.20007	-1.39141	3.16454e-25	1.21867e-22
COL18A1	2.30146	4.18513	4.40726e-25	1.6801e-22
TUBAL3	4.62792	-0.558584	6.10491e-25	2.30399e-22
LINC01133	3.80298	0.509848	1.03971e-24	3.885e-22
SULF1	4.01891	-0.0396848	1.77492e-24	6.5672e-22
ZNF560	5.23419	-0.524539	2.39211e-24	8.76489e-22
RP11-484L7.2	4.99686	-3.50235	3.05159e-24	1.10738e-21
LRIG3	4.24128	-1.56002	3.1591e-24	1.13547e-21
FBN3	3.2586	-0.753906	3.55274e-24	1.26491e-21
ADCY10	2.31062	0.202971	5.38682e-24	1.89999e-21
RP11-122L4.1	6.68772	-3.24728	6.10297e-24	2.13265e-21
TRDN	5.68322	-1.03836	8.29069e-24	2.87056e-21
LHCGR	4.30128	-2.66552	1.02603e-23	3.52021e-21
IGKV2-4	4.36225	-2.66833	1.34054e-23	4.55783e-21
HERC2P3	3.47913	4.56276	1.72349e-23	5.80755e-21
STK32A	4.07485	-2.86855	2.30668e-23	7.70391e-21
SMIM1	2.80815	0.74685	2.35257e-23	7.78824e-21
GJA5	4.10017	-2.31346	3.15864e-23	1.03658e-20
GDF2	4.87444	-3.06023	3.81274e-23	1.24045e-20
GABRG1	4.42102	-2.98801	4.95159e-23	1.5972e-20
SEMA6C	2.66015	3.16551	5.07395e-23	1.6228e-20
PTPRZ1	4.96831	-2.99209	1.05717e-22	3.35274e-20
AC016629.3	4.03108	-1.60521	1.13168e-22	3.55915e-20
SPON1	4.50453	4.47449	1.17493e-22	3.66463e-20
MAGI1-IT1	4.408	-2.63988	1.30269e-22	4.02978e-20
RP11-54A9.1	5.50829	-3.15522	1.38774e-22	4.25799e-20
DCAF4L2	5.22702	-3.25355	1.61624e-22	4.9191e-20
DKK1	5.45598	-0.963226	1.67953e-22	5.07084e-20
LINC01014	6.03349	-3.504	2.75783e-22	8.26035e-20
GSTM3	3.81299	3.13042	3.81695e-22	1.12541e-19
RP11-56F10.3	3.06322	-0.612379	4.631e-22	1.35484e-19
IGSF11	4.30001	-0.698786	6.08239e-22	1.76577e-19
CPNE4	3.25356	-1.2088	6.2359e-22	1.79651e-19
RP11-315A17.1	5.69802	-1.43597	7.64978e-22	2.18714e-19
ZNF723P	3.95172	-2.1912	8.93256e-22	2.51639e-19
EPOR	2.65824	3.92522	8.93472e-22	2.51639e-19
F2RL3	3.07323	0.422971	9.41649e-22	2.63243e-19
DPY19L2P1	3.55017	0.0302353	1.60349e-21	4.41721e-19
ARL5AP2	4.34573	-3.43641	1.77222e-21	4.84663e-19
ANKRD20A8P	3.92801	-2.80026	1.91582e-21	5.20165e-19
AGTR1	3.62738	-0.405882	1.9906e-21	5.3661e-19
THRB	4.03139	1.72587	2.12603e-21	5.69052e-19
KCNQ2	3.63531	-0.840477	2.20622e-21	5.86356e-19
BNC2	3.27039	0.368564	2.35666e-21	6.18432e-19
LINC01234	3.05306	-2.60813	2.35968e-21	6.18432e-19
RP11-717F1.1	5.86173	-3.39991	3.67817e-21	9.57338e-19
RP3-340B19.3	3.49849	-2.26756	4.21999e-21	1.09084e-18
FN3K	2.50697	2.64521	4.85759e-21	1.24711e-18
CHRM3-AS2	3.25158	3.42551	5.29734e-21	1.35082e-18
RPSAP29	2.42578	-1.15767	6.08674e-21	1.5417e-18
TRIM67	2.40556	-1.53233	7.29667e-21	1.83584e-18
NPC1L1	2.50053	-0.753477	7.43159e-21	1.85741e-18
PROS1	3.63078	1.88479	2.00609e-20	4.9809e-18
ABCB10P1	3.32582	-3.12465	2.35602e-20	5.77537e-18
IFNL4	4.0923	-2.02088	2.35667e-20	5.77537e-18
NEO1	3.43282	3.57355	2.61342e-20	6.36327e-18
CFAP161	3.46816	0.493798	2.79124e-20	6.75265e-18
AC005008.2	5.14599	-3.26662	3.31378e-20	7.96574e-18
SSTR3	2.94751	-0.317425	3.66514e-20	8.75457e-18
FAM43B	3.4202	-2.99128	4.73623e-20	1.12418e-17
EPB41L4A	2.24498	0.976707	4.81324e-20	1.13532e-17
RP13-726E6.1	3.47268	-2.34463	6.45199e-20	1.51241e-17
IFI27	3.29974	1.93611	7.19211e-20	1.6755e-17
SOX21	3.80568	-2.78966	9.90711e-20	2.29383e-17
RP11-244F12.3	3.32709	-2.23774	1.1197e-19	2.57667e-17
AC007405.8	4.11612	-2.72176	1.13533e-19	2.59681e-17
MRLN	3.19424	-2.62793	1.15998e-19	2.6372e-17
LINC00570	3.78731	-1.07195	1.18886e-19	2.68669e-17
IGKV3-31	5.72872	-3.4601	1.22429e-19	2.75028e-17
CMTM5	4.09325	1.28739	1.23305e-19	2.75356e-17
GULP1	4.75258	-0.285548	1.27635e-19	2.83351e-17
AC079466.1	4.96411	0.375692	1.28889e-19	2.84461e-17
PRKRIRP7	2.11693	-0.366833	1.71663e-19	3.76661e-17
PARP4P2	3.0032	0.27113	1.85558e-19	4.03407e-17
MAGEC1	6.24311	-3.446	1.8599e-19	4.03407e-17
CR2	3.01719	1.35489	1.98778e-19	4.2868e-17
B3GALT5-AS1	4.77824	-3.42246	2.133e-19	4.57384e-17
MAP7D2	3.41052	0.672616	3.0002e-19	6.39704e-17
CLCN4	3.19767	2.24513	3.05007e-19	6.46684e-17
CPEB1	3.04473	-0.699164	3.6184e-19	7.62896e-17
RTN1	3.95638	2.56365	4.36652e-19	9.15514e-17
GJA4	3.0076	0.673146	7.13314e-19	1.47915e-16
SNRPCP5	3.26398	-2.99554	7.5842e-19	1.56409e-16
AC002127.4	5.66545	-3.14615	9.52469e-19	1.9536e-16
RP11-232M24.1	6.24443	-3.26865	1.23518e-18	2.51978e-16
CTC-436P18.3	3.77835	-3.0654	1.46905e-18	2.98075e-16
KRT4	4.32748	-3.45297	1.54478e-18	3.11765e-16
FAM188B	2.66376	0.0665606	1.73618e-18	3.48529e-16
MAL	3.02227	1.85106	1.7898e-18	3.57392e-16
IGHG2	3.25895	8.47241	3.2585e-18	6.43853e-16
COL18A1-AS1	3.38227	-2.29803	5.06351e-18	9.95295e-16
FUT1	3.1888	1.47835	5.88459e-18	1.1507e-15
IFITM8P	3.21186	-3.0802	5.95388e-18	1.15824e-15
TSPAN12	4.0184	-1.14826	6.60264e-18	1.27786e-15
LEPR	2.2162	4.90151	6.77545e-18	1.30462e-15
MYH10	2.10869	4.84	6.90152e-18	1.32215e-15
RPL3L	2.08011	-1.48047	7.82038e-18	1.49061e-15
LCA5	2.75292	1.72174	9.16705e-18	1.73851e-15
AF127936.3	3.59377	-0.602969	1.03378e-17	1.95075e-15
ESPN	3.55504	1.67387	1.25627e-17	2.34712e-15
DNAJC6	2.94808	3.55907	1.30454e-17	2.42529e-15
SERPINI1	2.04616	1.46342	1.35404e-17	2.50498e-15
RP11-68I18.10	2.54559	-1.47902	1.42159e-17	2.61711e-15
SPTBN4	2.4321	-0.681443	1.53507e-17	2.81231e-15
CTD-2008L17.2	3.92075	-3.13274	1.63152e-17	2.97327e-15
CR1L	3.28398	0.961275	1.63869e-17	2.97327e-15
CNR1	3.24237	-0.459322	1.73945e-17	3.14099e-15
SNRPCP14	3.92048	-3.34873	1.86577e-17	3.35306e-15
CGA	4.72966	-3.4518	2.08175e-17	3.72347e-15
CLCA1	4.69863	-3.07742	2.2771e-17	4.05367e-15
FGF12	4.71087	-2.07223	2.31259e-17	4.09752e-15
MTND4P20	4.38902	-3.14335	2.45294e-17	4.32588e-15
RP11-1109M24.5	4.12603	-3.36903	2.78112e-17	4.88183e-15
LGALSL	2.88011	1.99804	2.81889e-17	4.92522e-15
CHMP1B2P	5.05237	0.361377	2.9604e-17	5.14863e-15
RPS3AP39	2.15648	-1.41522	3.39531e-17	5.87793e-15
CA1	3.44333	6.75206	3.76184e-17	6.48274e-15
HTR2C	4.52481	-3.29157	4.40089e-17	7.51537e-15
SPX	3.27899	-0.290412	7.94202e-17	1.34409e-14
TAC3	3.45446	-1.62423	8.71518e-17	1.46835e-14
CYP2C9	4.54066	-2.01911	9.11039e-17	1.52812e-14
RP11-410N8.4	3.11526	-2.31582	1.08651e-16	1.81437e-14
PDCL2	4.06178	-3.19903	1.24384e-16	2.06284e-14
RP11-45A16.4	5.03835	-3.41684	1.24623e-16	2.06284e-14
LINC01366	2.57542	-1.06357	1.3391e-16	2.20689e-14
WASF3	3.20711	0.697995	1.35101e-16	2.21684e-14
SPATA20P1	3.66313	-2.41072	1.50921e-16	2.46569e-14
RP11-48O20.5	3.79553	-2.17861	1.53526e-16	2.49744e-14
NXPE4	3.21277	-2.10285	1.92569e-16	3.11913e-14
SPDYC	2.30098	-1.08045	2.02652e-16	3.26841e-14
RP11-501O2.5	4.16969	-3.4159	2.22611e-16	3.57504e-14
CACNA1B	3.00504	-1.336	2.36989e-16	3.78981e-14
AC114498.1	3.48501	0.110061	2.62952e-16	4.18726e-14
C15orf54	4.27427	-2.51026	2.72552e-16	4.32189e-14
NUP62CL	3.43674	-0.386736	3.06993e-16	4.84766e-14
TMEM233	3.16991	-1.37522	3.40569e-16	5.35545e-14
PCDH17	3.17813	-0.592506	4.66132e-16	7.29952e-14
CDH1	3.2212	2.38002	5.44183e-16	8.48655e-14
PNMT	2.99255	0.347371	5.68109e-16	8.82322e-14
GJB5	2.46925	-2.11623	6.95268e-16	1.07539e-13
CXADR	2.88514	0.150342	7.92047e-16	1.22008e-13
IQCA1	3.48606	-2.2285	8.76897e-16	1.34529e-13
SHANK2	3.19427	-0.196988	9.3426e-16	1.42749e-13
GPR158	4.29797	-2.44447	1.0211e-15	1.55388e-13
LINC00871	6.92312	-1.97139	1.11604e-15	1.69154e-13
UBXN10	2.85199	1.1302	1.22557e-15	1.84275e-13
DSCAM	3.07869	-3.26756	1.37363e-15	2.04904e-13
CPB1	3.02309	-1.13954	1.38684e-15	2.06061e-13
AGAP1	2.9546	2.85722	1.45506e-15	2.15349e-13
SLC6A19	3.9442	0.953818	1.49293e-15	2.2009e-13
ROBO2	4.93138	0.500751	1.69089e-15	2.48305e-13
ANK1	3.17318	6.1031	1.79452e-15	2.625e-13
IGHV3-13	3.05873	1.66418	1.8928e-15	2.75808e-13
TRIM29	3.36217	-1.38019	2.21889e-15	3.2153e-13
NPY1R	3.69304	-2.73837	2.22362e-15	3.2153e-13
RP11-63D14.1	5.89184	-2.61238	2.38197e-15	3.43112e-13
RP11-809C18.3	3.92154	-3.25344	2.44647e-15	3.50734e-13
FAM178B	3.39575	2.08755	2.45346e-15	3.50734e-13
AC093159.1	2.81037	-1.72806	3.14682e-15	4.48126e-13
PCK1	3.559	-2.87025	3.1585e-15	4.48126e-13
MGAT4C	3.14197	-2.73847	3.38201e-15	4.78041e-13
RP4-555D20.2	2.97573	-1.804	3.54919e-15	4.99801e-13
UG0898H09	4.72372	-1.53194	4.1964e-15	5.88744e-13
PSMC1P11	2.75051	-2.72025	4.64376e-15	6.49094e-13
IGKV2-28	3.79725	-1.70904	4.96399e-15	6.91295e-13
PTPN5	3.74984	-2.05168	5.64501e-15	7.83245e-13
RSPH1	2.76742	0.51717	5.69204e-15	7.86877e-13
LINC01592	5.0658	-3.46957	5.79278e-15	7.97882e-13
GALNT18	3.81792	-0.496047	5.93733e-15	8.14818e-13
RP11-879F14.2	3.53722	-2.67075	6.49431e-15	8.88026e-13
SPTBN2	2.04962	3.39388	6.60376e-15	8.99732e-13
RP11-184M15.2	3.39012	-3.21378	6.78215e-15	9.20714e-13
HRCT1	3.42247	-3.40651	6.96356e-15	9.40946e-13
TMEM72	2.29716	0.316879	6.98105e-15	9.40946e-13
ARFGEF3	2.5516	-0.763179	7.80703e-15	1.04853e-12
CYP2C18	4.34311	-2.60661	8.69008e-15	1.16299e-12
TIMP3	3.73819	0.247704	9.04903e-15	1.20675e-12
RHAG	3.19932	4.47298	1.09536e-14	1.4556e-12
RNFT1P3	2.66713	-2.1039	1.17693e-14	1.5585e-12
IL1RAPL1	3.32458	-3.11804	1.30092e-14	1.71068e-12
CCDC68	2.74402	-0.471863	1.33559e-14	1.75018e-12
SOX21-AS1	3.45445	-2.94946	1.35425e-14	1.76849e-12
AC013460.1	2.79454	-1.49167	1.44395e-14	1.87912e-12
PRKD1	3.42861	-0.98753	1.60469e-14	2.08113e-12
RP11-445O3.1	5.25176	-3.39769	1.61911e-14	2.09264e-12
A2ML1	2.11816	1.24018	1.64225e-14	2.11172e-12
RP11-440G9.1	4.11726	-3.45538	1.64506e-14	2.11172e-12
LIPH	2.44642	0.331476	1.66147e-14	2.12556e-12
IGHV3-21	2.77669	4.04167	2.0081e-14	2.56032e-12
LINC00534	4.61519	-1.20156	2.15268e-14	2.73543e-12
MYEOV	2.67713	-1.78706	2.73167e-14	3.44794e-12
LINC01249	3.79523	-3.45908	2.82515e-14	3.55404e-12
GYPE	2.9288	1.87934	2.99792e-14	3.75886e-12
SNED1	2.12348	4.64254	3.25487e-14	4.0546e-12
ARHGAP42	2.72639	0.588842	3.25529e-14	4.0546e-12
IGHGP	2.88538	4.45967	3.28344e-14	4.07622e-12
GP5	2.70301	0.332562	3.561e-14	4.3919e-12
NKAIN3	4.5998	-2.77428	4.39949e-14	5.40836e-12
DPF3	2.48746	0.540436	4.42345e-14	5.42016e-12
HBBP1	4.00996	0.00729497	4.76203e-14	5.81616e-12
IL7	3.14135	1.50762	5.03139e-14	6.12531e-12
DSCAML1	2.65882	-1.31081	5.41046e-14	6.56561e-12
OR7E94P	3.7702	-2.88487	5.72212e-14	6.92156e-12
TGM2	2.74079	3.60194	6.52304e-14	7.86516e-12
AB015752.3	2.69956	-2.37097	6.71991e-14	8.07673e-12
CHAC1	2.42363	-0.0305632	6.75984e-14	8.09893e-12
TACC2	3.28657	0.293053	7.25202e-14	8.66111e-12
KLK7	3.19064	-3.31911	7.33185e-14	8.72883e-12
AMHR2	2.61603	-0.959506	7.47128e-14	8.86686e-12
LINC01474	4.13246	-2.54737	7.53801e-14	8.91801e-12
AQP1	2.60208	3.22505	8.19252e-14	9.66206e-12
RP4-555D20.1	3.22257	-2.59398	8.34133e-14	9.80691e-12
RP11-3D4.4	2.34895	-1.43565	1.00498e-13	1.17061e-11
FGF14	3.33211	-1.96125	1.05151e-13	1.22105e-11
C1orf116	2.61349	-0.671219	1.11804e-13	1.29432e-11
RP11-231N3.1	3.33279	-3.04535	1.26901e-13	1.46461e-11
CREB3L3	3.2159	-0.196771	1.29668e-13	1.48979e-11
ACKR1	3.39964	0.592269	1.29873e-13	1.48979e-11
COL6A4P1	3.01279	-2.76527	1.30731e-13	1.49509e-11
LINC01217	5.14504	-2.81519	1.63025e-13	1.85878e-11
KLF1	2.67701	3.76745	1.70768e-13	1.94119e-11
NFATC4	3.07647	0.299417	1.96434e-13	2.22626e-11
ATP1B2	3.194	2.21089	2.09675e-13	2.3692e-11
FAM124B	2.06496	3.28568	2.29662e-13	2.58729e-11
IL17REL	2.30811	-1.29649	2.79158e-13	3.13554e-11
PCYT1B	2.88629	1.37609	2.88525e-13	3.23113e-11
RP11-767I20.1	3.27256	-3.4346	3.04977e-13	3.40228e-11
GATA5	3.73056	-1.58535	3.0561e-13	3.40228e-11
GJB4	2.20229	-2.21439	3.09285e-13	3.43306e-11
ITGA2B	2.68117	5.62773	3.15621e-13	3.49312e-11
AQP2	2.84617	-3.3732	3.4187e-13	3.77257e-11
PLPPR1	5.14042	-2.29989	3.76376e-13	4.1292e-11
CNKSR3	2.32954	3.45814	3.89266e-13	4.25823e-11
RP3-380E11.2	5.71843	-3.19069	4.27134e-13	4.65898e-11
TRPC6	3.57015	-0.557717	4.32039e-13	4.6989e-11
MAP2	2.41347	-1.44812	4.56774e-13	4.95363e-11
JAM2	2.02694	0.921431	4.68658e-13	5.06795e-11
HES5	2.7707	-2.74105	4.9402e-13	5.32695e-11
TMPRSS4	2.58747	-1.18645	5.05507e-13	5.43528e-11
ROR1-AS1	2.61882	-2.80443	5.42467e-13	5.79963e-11
FAM162B	3.46076	-3.19688	5.60464e-13	5.95814e-11
MAGEA1	5.6781	-2.83446	5.6203e-13	5.95814e-11
FAM110D	2.33487	-2.38587	6.18762e-13	6.54119e-11
BPIFB4	3.34403	-3.12903	6.68119e-13	7.04324e-11
ZNF208	2.75196	-0.0575348	7.45415e-13	7.81443e-11
SMCO3	2.10875	-1.8027	7.7922e-13	8.14619e-11
IGHV3-30	2.6652	3.94378	7.98633e-13	8.32608e-11
CTB-171A8.1	3.47003	-0.934461	9.66931e-13	1.00529e-10
IZUMO1	2.19611	-1.39263	1.08035e-12	1.12012e-10
BACE2	2.77819	2.88454	1.08494e-12	1.1218e-10
SLFN14	2.0864	1.24967	1.16024e-12	1.19638e-10
MYL4	3.09642	2.25308	1.21689e-12	1.25137e-10
STRA6	3.15668	-1.32778	1.42238e-12	1.45872e-10
LINC00989	3.60975	-1.25297	1.44867e-12	1.48164e-10
PALMD	2.84036	-0.607775	1.5603e-12	1.5915e-10
HSPD1P16	3.39984	-2.61964	1.70415e-12	1.73354e-10
RP3-323A16.1	2.8771	1.50681	1.76422e-12	1.78983e-10
CPS1	3.26165	0.139771	1.93803e-12	1.95564e-10
C6orf25	2.4567	5.02261	2.01957e-12	2.03249e-10
RAI2	2.8721	-2.53913	2.06782e-12	2.07552e-10
SEMA3C	3.43604	1.7734	2.18239e-12	2.1847e-10
SLC22A17	2.69306	1.2786	2.41857e-12	2.41473e-10
DPEP3	3.0556	2.20677	2.497e-12	2.48646e-10
BX842568.2	2.20109	-1.62011	2.84755e-12	2.82807e-10
DGKB	3.2355	-3.18327	2.89167e-12	2.86435e-10
LINC01033	2.49544	-2.97719	3.00162e-12	2.96547e-10
ALDH1A1	3.30063	3.91685	3.11309e-12	3.06757e-10
SEC14L3	2.86806	-0.289219	3.20039e-12	3.14539e-10
CTTN	2.45863	2.14089	3.43852e-12	3.37064e-10
IGKV2D-28	3.39657	-2.88527	3.5812e-12	3.49236e-10
DCC	2.67581	-2.25446	3.67441e-12	3.57403e-10
RP11-94A24.1	3.48556	-2.56637	3.72443e-12	3.61337e-10
RP4-742C19.12	2.35167	-1.90085	3.83935e-12	3.71531e-10
FAM89A	2.24324	3.01227	3.96423e-12	3.82635e-10
NXPE1	2.49852	-2.30642	4.00002e-12	3.85104e-10
TAL1	2.76593	5.07216	4.0461e-12	3.88549e-10
CTD-3162L10.5	2.96246	-3.31164	4.23059e-12	4.05235e-10
FRRS1L	2.25435	-2.8618	4.74463e-12	4.53322e-10
PKHD1L1	2.87878	0.549635	4.85766e-12	4.62949e-10
PAGE5	4.21531	-2.95595	4.8893e-12	4.64709e-10
RGS6	3.19582	0.321729	4.90074e-12	4.64709e-10
UBXN10-AS1	3.0488	-2.89498	5.27311e-12	4.98765e-10
XXbac-BPG154L12.4	2.28382	-1.79627	5.49029e-12	5.18009e-10
APOE	2.55849	2.91495	5.60848e-12	5.27841e-10
PLPP4	3.46717	-1.2533	5.64418e-12	5.29879e-10
COL18A1-AS2	3.15823	-3.27749	7.93927e-12	7.43494e-10
RP11-90C4.1	2.73662	-3.38773	8.41367e-12	7.8597e-10
FAP	2.53984	-2.69616	9.7593e-12	9.09422e-10
DPYSL5	2.78596	-2.01663	1.01674e-11	9.45115e-10
C1GALT1P2	3.11837	-2.61778	1.04925e-11	9.72944e-10
HMGB3P27	3.05209	-3.46077	1.17908e-11	1.08798e-09
RP11-455B3.1	2.97974	-2.79919	1.20036e-11	1.10492e-09
RP11-324C10.1	3.81368	-3.39646	1.24213e-11	1.14059e-09
MCF2	2.13492	0.46128	1.2462e-11	1.14154e-09
RP11-541F9.2	3.50378	-2.05432	1.26553e-11	1.15644e-09
PKDCC	2.93954	-0.523478	1.30835e-11	1.19268e-09
NBPF13P	2.92561	-0.0694501	1.38452e-11	1.25908e-09
GATA1	2.55596	3.78464	1.52115e-11	1.3767e-09
RP11-219G17.4	2.57507	-0.645423	1.64075e-11	1.47847e-09
KIF5A	3.0638	0.3773	1.65054e-11	1.48313e-09
NLRP11	3.00574	-0.915632	1.79906e-11	1.61274e-09
CLDN16	3.13037	-3.20003	1.82552e-11	1.63259e-09
AC011518.1	3.48977	-3.15169	1.93111e-11	1.72293e-09
SLC35D3	2.89487	-2.08669	1.94977e-11	1.73548e-09
AC003973.3	2.75244	-0.371745	1.98187e-11	1.7599e-09
PARK2	2.68593	-0.12424	2.15708e-11	1.90652e-09
LINC01218	4.12731	-1.99978	2.17716e-11	1.91977e-09
FCER1A	2.71878	5.06343	2.39055e-11	2.10302e-09
OR7E12P	3.11348	-3.35918	2.42025e-11	2.1242e-09
LINC01502	2.83372	-3.12685	2.51996e-11	2.20147e-09
COL15A1	2.80529	-0.0218881	2.99141e-11	2.59531e-09
CYP4F12	2.46996	-0.72815	3.06332e-11	2.6516e-09
POU6F2	2.32746	-2.57309	3.17497e-11	2.74196e-09
NBPF4	3.65062	-2.57216	3.23787e-11	2.78989e-09
THRB-IT1	3.61577	-2.02851	3.67624e-11	3.16039e-09
C4orf50	2.42832	-1.57804	3.75578e-11	3.22144e-09
ST6GAL2	3.63322	1.29869	3.87106e-11	3.31279e-09
OLA1P2	2.3207	-2.6534	4.0484e-11	3.45589e-09
CEACAM16	3.7062	-2.17961	4.0566e-11	3.45589e-09
CDC42BPA	3.25317	4.28409	4.14085e-11	3.51972e-09
RP11-85G21.3	3.2973	-0.105862	4.18552e-11	3.54969e-09
AC013410.1	2.55658	-3.15014	4.28107e-11	3.6226e-09
RHCE	2.53067	2.29119	4.74943e-11	4.00992e-09
RP11-556I14.1	2.99879	-2.22725	4.85778e-11	4.08313e-09
MYCT1	3.68102	2.86177	5.15292e-11	4.32057e-09
HID1	2.20816	1.41969	5.34716e-11	4.46464e-09
RP11-108K3.1	2.46089	-3.13042	6.09905e-11	5.07e-09
LBP	3.30978	0.851296	6.5443e-11	5.42817e-09
IFITM10	2.43688	2.14416	7.21986e-11	5.96231e-09
HSPA2	2.05127	1.18256	8.26719e-11	6.81231e-09
TEAD1	3.10628	0.591239	8.38205e-11	6.87693e-09
GYG2P1	3.74332	-1.93711	8.47994e-11	6.94214e-09
STATH	4.83361	-2.26978	8.54993e-11	6.9843e-09
RP11-60C6.5	3.61853	-3.34979	9.34865e-11	7.60384e-09
CTD-2600O9.1	2.08271	-2.83834	9.62174e-11	7.80913e-09
RP11-685B14.3	3.1802	-3.36418	9.95256e-11	8.06029e-09
PDZK1IP1	2.69851	0.379501	1.05764e-10	8.54719e-09
CRYBA4	2.59473	-3.30495	1.07546e-10	8.6726e-09
LINC00355	3.32728	0.508429	1.37794e-10	1.10411e-08
XK	2.48508	3.9609	1.47038e-10	1.17319e-08
LINC01055	2.5493	-2.81005	1.55369e-10	1.23705e-08
C7orf34	2.37346	-0.767735	1.59569e-10	1.26516e-08
PRR26	2.58505	-1.70589	1.66361e-10	1.3138e-08
TNXB	2.21032	3.53487	1.66401e-10	1.3138e-08
TMEM158	2.51941	-0.124937	1.71578e-10	1.34903e-08
FJX1	2.42515	-2.29708	1.72131e-10	1.35057e-08
AC129492.6	2.41532	-0.347708	1.85019e-10	1.44269e-08
RNF180	3.12749	-1.89005	2.15303e-10	1.67192e-08
TMPRSS11F	3.25749	-2.44976	2.21398e-10	1.7122e-08
CA3	2.19062	0.750526	2.26494e-10	1.74804e-08
RP5-1120P11.1	2.60145	-3.09902	2.42987e-10	1.8715e-08
ITGBL1	3.23405	-2.10743	2.44136e-10	1.87651e-08
NRG3	2.82448	-3.15264	2.62133e-10	2.00667e-08
FZD4	2.26598	0.397238	2.63336e-10	2.0118e-08
KCNS3	3.18697	-2.04598	2.66408e-10	2.03116e-08
POU2F3	2.60517	-1.6957	2.96524e-10	2.25167e-08
HBQ1	2.06275	-0.0280468	3.06434e-10	2.3176e-08
RP11-96B2.1	2.96769	-2.81372	3.10512e-10	2.34375e-08
SERPINA5	3.19526	-3.13461	3.15836e-10	2.37917e-08
RP11-325P15.1	2.88984	-0.160096	3.25126e-10	2.43941e-08
IGSF23	3.08031	-2.37388	3.46048e-10	2.58611e-08
CTBP2P2	2.86009	-3.35403	3.52076e-10	2.62016e-08
IGKC	2.35857	9.34206	3.59021e-10	2.66198e-08
SDR16C5	2.68982	-3.28836	3.68375e-10	2.72597e-08
RP11-930P14.1	2.63165	-1.59243	3.7118e-10	2.74136e-08
HCG23	2.51513	-2.84588	3.72177e-10	2.74335e-08
TMEM56	2.77458	3.10559	4.03194e-10	2.96042e-08
FNDC4	2.41403	-2.41131	4.04705e-10	2.96574e-08
CTD-2537I9.15	2.31827	-3.01681	4.24524e-10	3.09894e-08
PKLR	2.97097	2.53355	4.25472e-10	3.09987e-08
RPS3AP41	2.04647	-2.58943	4.31489e-10	3.13765e-08
AKR1C5P	2.4776	-3.10646	4.63662e-10	3.34581e-08
EDNRB	2.82934	-0.0101934	4.87291e-10	3.50961e-08
RGS16	2.15865	0.15486	4.96265e-10	3.56744e-08
RP11-673E1.3	2.45566	-1.12733	5.18642e-10	3.71415e-08
EPAS1	2.27594	3.30045	5.40211e-10	3.85398e-08
LINC01239	3.17119	-3.38173	5.4951e-10	3.91293e-08
AC006946.16	3.25844	-0.437396	5.59199e-10	3.97442e-08
NLGN1	3.68679	-0.317735	5.64612e-10	4.00535e-08
CADPS2	2.7745	-0.808666	5.7254e-10	4.05397e-08
PLAC1	2.53818	-2.94669	6.04803e-10	4.25844e-08
AC068831.16	2.01933	-2.56093	6.13389e-10	4.31085e-08
RNA5SP273	4.45878	-3.34521	6.78723e-10	4.75232e-08
TMEM108	2.5734	-0.214217	6.92964e-10	4.83651e-08
RP13-379O24.3	3.24323	-3.44989	6.9331e-10	4.83651e-08
LINC01340	3.11058	-3.20086	7.06398e-10	4.91872e-08
CHSY3	2.76087	-0.857	7.24367e-10	5.02932e-08
KCNJ8	3.09621	-1.32182	7.24947e-10	5.02932e-08
IGHV3-43	2.57093	1.41934	7.28728e-10	5.04628e-08
ART4	2.73641	0.922483	7.63425e-10	5.27686e-08
ANKRD36BP2	2.29851	3.03398	7.70975e-10	5.31931e-08
UGT2B7	3.47873	-3.33946	7.72702e-10	5.32149e-08
SPTB	2.54978	4.99526	8.22217e-10	5.63167e-08
IGKV2OR22-3	2.8817	-2.56857	8.34011e-10	5.70209e-08
DENND2C	2.14006	0.47806	8.64951e-10	5.89229e-08
CENPUP1	3.17597	-3.46931	9.55245e-10	6.47234e-08
KRT13	3.30484	-0.936034	9.6846e-10	6.55012e-08
SDPR	2.4713	4.37986	1.1938e-09	8.00247e-08
ATP7B	2.28678	4.34627	1.22094e-09	8.15544e-08
BHLHE22	3.58413	-1.64437	1.26287e-09	8.40578e-08
THCAT158	2.42207	-1.24055	1.31464e-09	8.7043e-08
PBX1	3.23952	3.05984	1.32333e-09	8.74648e-08
KIAA2022	2.46042	-0.955557	1.3458e-09	8.87948e-08
RP11-365H23.1	2.25357	-0.918195	1.39994e-09	9.22058e-08
SLC18A2	2.56556	3.52624	1.41893e-09	9.32935e-08
LINC01216	4.26234	-3.42752	1.46842e-09	9.62122e-08
COX6CP13	2.49447	-2.3606	1.53798e-09	1.00595e-07
IGHV3-16	2.56714	-3.20688	1.56772e-09	1.02189e-07
RPL38P1	2.70131	-2.26574	1.56777e-09	1.02189e-07
FAM83F	2.14578	0.890753	1.75574e-09	1.14047e-07
LL21NC02-21A1.1	2.92515	-3.27942	1.7697e-09	1.14757e-07
SPATA16	3.14759	-2.75777	1.88509e-09	1.2203e-07
IGHV4-28	2.25663	1.20748	1.95616e-09	1.26414e-07
TNXA	2.32936	-2.9529	1.98464e-09	1.28034e-07
RAMP3	2.59244	-1.40505	2.01859e-09	1.30002e-07
TRIM55	2.4067	-2.7291	2.07692e-09	1.33305e-07
NFIB	2.84057	0.731699	2.11696e-09	1.35644e-07
PTPRR	2.9749	-2.04697	2.22455e-09	1.42055e-07
IGHE	2.61044	-0.106829	2.23989e-09	1.42793e-07
EPHX2	2.21579	1.37901	2.2555e-09	1.43545e-07
GRHL3	2.1073	-1.25138	2.28817e-09	1.4538e-07
LINC01561	3.22045	-3.29888	2.30597e-09	1.46264e-07
ARSDP1	3.69246	-2.00647	2.31885e-09	1.46835e-07
TMEM45A	2.23374	-0.16124	2.52152e-09	1.59134e-07
NTS	4.89246	-2.94574	2.66953e-09	1.67913e-07
SLC34A2	2.70613	-1.4798	2.83203e-09	1.77543e-07
MYO10	2.30806	1.58333	2.93711e-09	1.83521e-07
MYH8	2.79677	-3.41404	2.96168e-09	1.8475e-07
NTRK1	2.5538	2.80487	3.42656e-09	2.12345e-07
FAM189A1	2.70717	-0.751149	3.50732e-09	2.16994e-07
CTC-459M5.2	2.62584	-3.11681	3.51899e-09	2.1736e-07
SHANK2-AS1	3.11648	-2.93059	3.65693e-09	2.25511e-07
RP5-1101C3.1	2.74766	-2.94018	3.73281e-09	2.29527e-07
PTGER3	3.21038	2.54368	3.7901e-09	2.31829e-07
EYA2	2.24201	-1.81769	3.88789e-09	2.37425e-07
RP11-755J8.1	2.76007	-2.71972	4.04816e-09	2.46415e-07
SLC6A9	2.04683	2.64494	4.29647e-09	2.59854e-07
IFNL3P1	2.73927	-1.82746	4.40262e-09	2.65423e-07
AL035610.2	2.36215	-3.40068	4.53734e-09	2.73109e-07
KCNJ15	2.7363	1.30724	4.5649e-09	2.7433e-07
RNF113B	2.91618	-3.3561	4.64438e-09	2.78221e-07
C2CD4A	2.50948	-3.42424	4.81836e-09	2.87729e-07
IGHV1OR15-2	2.49249	-0.81416	4.90934e-09	2.92359e-07
AKR1C2	2.36635	0.074336	4.92496e-09	2.92706e-07
RP11-70C1.3	2.14169	-2.24041	5.07422e-09	3.00803e-07
CTC-756D1.1	2.0848	-1.56629	5.08512e-09	3.00803e-07
LMCD1	2.25648	0.290689	5.47336e-09	3.22757e-07
IGLV2-8	2.21146	2.90595	5.87433e-09	3.44786e-07
PRSS3P1	2.45403	-2.71994	5.9618e-09	3.49376e-07
PCSK9	2.61674	-1.92854	5.97135e-09	3.49393e-07
RP11-295P22.2	2.50333	-1.62076	5.99628e-09	3.50309e-07
RP1-202O8.2	2.53514	-2.58955	6.14832e-09	3.58083e-07
SDC1	2.22939	2.55946	6.18908e-09	3.59901e-07
BPIFB3	3.10163	-3.46305	6.34709e-09	3.68522e-07
PARD3B	3.14387	0.746754	6.48153e-09	3.7575e-07
TPD52L1	2.00827	-0.775813	6.80897e-09	3.93523e-07
XRCC6P4	2.07679	-2.56262	6.99456e-09	4.03631e-07
RPL17P17	2.18732	-3.03147	7.42766e-09	4.27317e-07
FAM26E	2.57475	-1.44027	7.73852e-09	4.44523e-07
RP11-265O12.1	2.33197	-3.10349	8.11923e-09	4.63878e-07
RP11-69L16.6	2.42866	-1.86429	8.12463e-09	4.63878e-07
RP11-394A14.2	3.087	-2.20482	8.45615e-09	4.82077e-07
RP11-533K9.3	3.28386	-3.44331	8.54765e-09	4.86559e-07
PVALB	2.77183	-3.15964	9.3039e-09	5.28809e-07
RP5-1044H5.1	2.43724	-1.79819	9.36354e-09	5.31398e-07
FXYD2	2.02088	-0.761967	9.49396e-09	5.37991e-07
XKR3	2.38862	0.0651281	9.7028e-09	5.49001e-07
SERPINE2	2.43783	3.13766	9.84513e-09	5.56221e-07
SHROOM2P1	4.04369	-1.95438	9.87622e-09	5.57143e-07
CTC-321K16.1	3.23519	-3.39783	1.03268e-08	5.80826e-07
RP4-530I15.6	2.40293	-0.500329	1.03443e-08	5.80943e-07
CECR7	2.81315	1.06578	1.0612e-08	5.94211e-07
SLC25A21	2.9832	-0.793475	1.06856e-08	5.96561e-07
IGKV1OR22-1	2.54226	-2.44394	1.10505e-08	6.14204e-07
PDK4	2.90047	4.40501	1.18505e-08	6.54816e-07
RP11-211A18.1	2.84708	-3.07715	1.24007e-08	6.83215e-07
RP5-1096D14.6	2.47941	-3.42808	1.24685e-08	6.85949e-07
IGKV3-20	2.07776	5.32196	1.29224e-08	7.07822e-07
RP11-57H12.3	2.37756	-1.7863	1.33914e-08	7.31393e-07
OR6R1P	2.48092	-1.93159	1.48452e-08	8.06126e-07
TMEM133	2.28521	-1.03119	1.51831e-08	8.23289e-07
SHCBP1L	2.14439	-3.16842	1.57554e-08	8.49443e-07
HEPH	2.40707	-0.587726	1.57955e-08	8.50386e-07
TLL1	2.91844	-3.02066	1.62499e-08	8.72365e-07
CPEB1-AS1	2.54168	-2.10118	1.65948e-08	8.88351e-07
GATA6	2.0524	-2.65949	1.68748e-08	9.00788e-07
APOC1	2.5684	0.618972	1.76111e-08	9.38762e-07
IGKV1-8	2.1406	0.725397	1.89101e-08	1.00658e-06
RTP3	2.71071	-3.26376	1.91115e-08	1.01444e-06
ACOXL	2.02985	-1.68991	2.02825e-08	1.07207e-06
XCR1	2.27106	-0.739589	2.14587e-08	1.1295e-06
AKR1C8P	2.17652	-2.356	2.20276e-08	1.15599e-06
RP11-10A14.4	2.34688	-2.00642	2.20356e-08	1.15599e-06
ZNF804B	4.73473	-2.5597	2.20997e-08	1.15679e-06
IFNG-AS1	2.14808	0.358673	2.33821e-08	1.22053e-06
MSRB1P1	2.74264	-3.42238	2.34332e-08	1.2215e-06
IGF1	2.25817	-1.96544	2.39421e-08	1.24631e-06
HMCN1	2.2204	-0.575096	2.41069e-08	1.25143e-06
LRRC4C	2.41341	-2.63407	2.42658e-08	1.25795e-06
VIP	4.03623	-1.64903	2.51349e-08	1.29766e-06
XXbac-BPG170G13.31	2.02845	-2.76495	2.75835e-08	1.41826e-06
IGHV1-67	2.37272	-0.863359	2.77055e-08	1.42259e-06
PRSS16	2.18854	-0.964147	2.79378e-08	1.43257e-06
TRIM40	2.66934	-3.05744	2.80668e-08	1.43723e-06
RP1-18D14.7	2.53089	1.43319	2.81315e-08	1.43859e-06
IGHV1-18	2.17213	4.14212	2.84227e-08	1.45152e-06
IL1RL1	2.94767	3.92664	2.88025e-08	1.467e-06
AP001476.2	2.37974	-3.13554	2.88037e-08	1.467e-06
SYN2	2.45758	0.448449	2.97621e-08	1.50971e-06
TSPAN9	2.28676	1.30725	2.99009e-08	1.51066e-06
RN7SL204P	2.50959	-3.24692	3.01651e-08	1.52197e-06
RP11-672A2.4	2.73507	-3.00586	3.11075e-08	1.56533e-06
NECAB1	2.43096	2.03408	3.25299e-08	1.63473e-06
MIPOL1	2.68812	-0.816808	3.30497e-08	1.65424e-06
STEAP1B	2.24035	-2.42481	3.35059e-08	1.67264e-06
IGKV3-11	2.07019	5.55984	3.47838e-08	1.73185e-06
ELFN2	2.53603	-0.537362	3.8182e-08	1.89173e-06
SPINK5	2.55879	-2.47584	3.81955e-08	1.89173e-06
AC113133.1	2.57737	-2.17961	3.86756e-08	1.913e-06
CYYR1	3.4746	2.48397	4.00801e-08	1.97948e-06
RP11-501J20.5	3.00748	-0.557905	4.01245e-08	1.97948e-06
NFIA	2.57468	4.27535	4.22694e-08	2.08257e-06
AP000695.6	2.52291	-1.73222	4.3e-08	2.1158e-06
ABCB10P4	2.23067	-3.39025	4.41979e-08	2.17191e-06
GPRC5D	2.27478	-0.570477	4.49439e-08	2.2057e-06
PRDM5	2.8213	-0.241655	4.71791e-08	2.30341e-06
AC004053.1	2.34879	-3.10726	4.90084e-08	2.38655e-06
RAB3IL1	2.17898	1.7884	5.0652e-08	2.46024e-06
KCNIP1	2.88656	-0.385548	5.16532e-08	2.4996e-06
KIR2DL1	2.14407	-1.56884	5.30518e-08	2.56361e-06
CLIC6	2.3718	-1.25937	5.40511e-08	2.60855e-06
AC004603.4	3.11031	-3.45537	5.41507e-08	2.61002e-06
RP1-60O19.1	2.48019	-2.9902	5.47094e-08	2.63023e-06
RUNDC3A	2.04627	1.09557	5.59444e-08	2.67597e-06
MYOC	2.57615	-3.18874	5.7001e-08	2.72306e-06
SLC25A21-AS1	3.24251	-2.81314	6.13822e-08	2.92127e-06
TMEM246	3.17606	0.7427	6.35567e-08	3.01336e-06
AFAP1L1	2.42401	1.21244	6.43607e-08	3.04383e-06
IGHJ2	2.20481	0.0689227	6.46225e-08	3.05238e-06
CACNG8	2.63229	0.484772	6.51654e-08	3.07335e-06
RP11-10A14.5	2.26693	-2.67049	6.52294e-08	3.07335e-06
HMP19	2.12768	-3.01136	6.5517e-08	3.08305e-06
POM121L2	3.31412	-2.97968	7.06965e-08	3.30441e-06
RTP5	2.58048	0.132064	7.07462e-08	3.30441e-06
C1orf226	2.50462	1.44355	7.3817e-08	3.44358e-06
RP4-564M11.2	2.33279	-2.75482	7.80484e-08	3.62752e-06
FAM132B	2.24713	2.16705	7.88544e-08	3.66047e-06
FRZB	2.91375	-0.0309403	8.05582e-08	3.73497e-06
RP11-506K6.4	2.23912	-1.02507	8.1339e-08	3.76654e-06
LINC01484	2.17267	-1.72277	8.47452e-08	3.91947e-06
AVPR1A	2.67167	0.545338	8.49453e-08	3.92391e-06
WLS	2.77816	1.30914	8.54004e-08	3.94011e-06
PLVAP	2.15083	1.74177	8.80975e-08	4.04477e-06
ELN	2.61101	2.59633	8.93664e-08	4.09307e-06
TRERNA1	2.36303	-3.34827	9.00389e-08	4.11887e-06
HOOK1	2.11575	1.91266	9.21168e-08	4.20882e-06
ROR2	2.34509	-0.318319	9.25979e-08	4.22569e-06
OTOGL	2.84284	-2.13106	9.33694e-08	4.25575e-06
IGKV1D-39	2.86981	-2.1003	9.55924e-08	4.35182e-06
KIR3DL1	2.13551	-0.653422	9.89488e-08	4.48811e-06
CLNK	2.52538	2.6385	9.91809e-08	4.48811e-06
SELENBP1	2.49304	3.90412	9.97925e-08	4.51038e-06
KB-176G8.1	2.06927	-1.78475	1.0508e-07	4.74367e-06
RP11-707A18.1	4.2361	-1.98165	1.05306e-07	4.74822e-06
IGHV4-31	2.01756	2.15476	1.0652e-07	4.79151e-06
CH507-42P11.8	2.0156	2.92802	1.15541e-07	5.16035e-06
RP11-1299A16.3	2.13346	-0.925062	1.19049e-07	5.30448e-06
RP11-511B23.3	2.61854	-2.91672	1.20628e-07	5.36853e-06
CHRNA1	2.90176	-3.36203	1.21347e-07	5.39415e-06
IGHG3	2.01869	6.54054	1.23903e-07	5.49484e-06
AHSP	2.56506	4.54649	1.25786e-07	5.57181e-06
RAP1GAP	2.05994	1.86326	1.31504e-07	5.81826e-06
PEAR1	2.43946	4.35646	1.41103e-07	6.21378e-06
CTB-147C13.1	3.3012	-2.27073	1.41482e-07	6.22325e-06
IGLV2-23	2.04611	3.87366	1.44681e-07	6.35654e-06
THEGL	2.13886	-2.68671	1.46465e-07	6.42741e-06
CYP19A1	2.40945	-1.47533	1.5438e-07	6.75123e-06
CTAGE3P	2.0877	-1.02357	1.6862e-07	7.34839e-06
MIR1302-5	2.07145	-2.56001	1.68987e-07	7.35591e-06
MYO3B	2.09903	-1.30047	1.73748e-07	7.54576e-06
AC097467.2	2.23353	-2.47009	1.74447e-07	7.56737e-06
THY1	2.46336	1.03024	1.7532e-07	7.59655e-06
IARS2P1	3.42396	-2.52244	1.77655e-07	7.64695e-06
PLAC4	2.48974	1.37154	1.77699e-07	7.64695e-06
AQP10	2.2971	-1.5727	1.87278e-07	8.03166e-06
KRT19P2	2.52366	-3.34888	2.03107e-07	8.6613e-06
FAT4	2.4484	0.582387	2.08072e-07	8.83313e-06
STMN4	2.06454	-3.17712	2.09654e-07	8.89029e-06
IGLL5	2.08027	4.65507	2.14495e-07	9.08533e-06
AP001434.2	3.24441	-2.69429	2.18063e-07	9.22248e-06
RP11-440D17.3	2.4838	-0.723738	2.31785e-07	9.75204e-06
LINC00691	2.03351	-2.98601	2.40682e-07	1.00926e-05
RP11-244N9.6	2.37988	-2.39643	2.60188e-07	1.07907e-05
ZNF229	2.26326	1.84961	2.60686e-07	1.07994e-05
KCND2	3.72076	-2.9349	2.8944e-07	1.1902e-05
RP11-477H21.2	3.514	-2.23267	2.97346e-07	1.22109e-05
STXBP6	2.49817	0.450905	3.07596e-07	1.25993e-05
RP11-288C17.1	2.61228	-2.80376	3.07805e-07	1.25993e-05
ENPP1	2.00042	-1.72439	3.16861e-07	1.29559e-05
RP11-314N14.1	3.48967	-3.15479	3.29394e-07	1.34247e-05
ADAMTS20	3.68364	-2.52744	3.36897e-07	1.3701e-05
IGLV3-19	2.03201	4.09082	3.43354e-07	1.39201e-05
IGKV1D-16	2.09849	0.0358428	3.54559e-07	1.43266e-05
IGHV1-17	2.17801	-2.54765	3.56815e-07	1.44023e-05
RP1-230L10.1	3.80847	-3.43844	3.72943e-07	1.50052e-05
CTTNBP2	2.49411	-1.91663	3.8083e-07	1.53062e-05
CFH	2.36039	4.28447	3.87722e-07	1.55666e-05
2017-03-04	2.07385	-2.48932	4.08842e-07	1.63624e-05
TBC1D12	2.28724	2.21563	4.13409e-07	1.64927e-05
AF121898.3	3.40351	-2.75438	4.18828e-07	1.66736e-05
IGSF11-AS1	3.47126	-3.45115	4.22373e-07	1.6797e-05
PPP1R14A	2.31343	0.340124	4.29886e-07	1.70598e-05
AC007204.2	2.46566	-1.12374	4.3445e-07	1.72229e-05
KLHDC8A	2.55154	-0.0760864	4.5747e-07	1.80785e-05
ITGB3	2.46872	3.62782	4.73949e-07	1.8671e-05
GYPA	2.45729	3.90309	4.85708e-07	1.90547e-05
RP11-211A18.2	3.16326	-2.25264	4.94863e-07	1.93535e-05
KCNH2	2.25847	4.70798	4.98474e-07	1.94544e-05
RP11-114G22.1	2.5423	-1.778	5.2078e-07	2.02621e-05
CD46P1	2.03379	-2.41192	5.21974e-07	2.02824e-05
ST6GALNAC1	2.0096	0.382332	5.52532e-07	2.13106e-05
BMP2	2.62424	-0.131356	5.91106e-07	2.26251e-05
TSPAN6	2.11909	-0.536862	6.04268e-07	2.30354e-05
RASSF9	2.7321	-2.33143	6.28123e-07	2.39206e-05
PAQR9-AS1	2.15072	-2.04513	7.00637e-07	2.65216e-05
RP4-660H19.1	3.06264	-3.25878	7.19714e-07	2.7162e-05
FAM83A	2.27158	1.67779	7.29815e-07	2.74882e-05
ELOVL7	2.14046	2.62425	7.41951e-07	2.78342e-05
MC4R	2.74981	-3.02512	7.94957e-07	2.95627e-05
HEY2	2.51628	-1.86975	7.95075e-07	2.95627e-05
EPS8L3	2.66057	-1.81	8.19122e-07	3.03671e-05
YBX2	2.04464	-0.621607	8.29558e-07	3.07238e-05
IGKV1OR2-108	2.13624	-0.195605	9.112e-07	3.3452e-05
BTBD17	2.03415	-3.02269	9.47515e-07	3.46504e-05
RP4-569D19.5	2.04941	-1.65385	9.71386e-07	3.54204e-05
CD24	2.50748	4.17266	9.78422e-07	3.5592e-05
CTB-83J4.1	2.03355	-1.80518	1.07783e-06	3.88512e-05
TRPC3	2.10642	-2.50702	1.09257e-06	3.93451e-05
HMGB1P30	2.2822	-2.50017	1.10297e-06	3.96439e-05
AC103563.5	2.4846	-3.07245	1.1435e-06	4.0906e-05
HTR2A	2.36774	-1.51598	1.14568e-06	4.0945e-05
RGAG1	2.03235	-1.80405	1.15616e-06	4.12807e-05
FAR2P2	2.56202	-2.48407	1.17347e-06	4.18591e-05
LINC01436	3.67892	1.10983	1.17541e-06	4.18885e-05
ZNF98	2.74293	-0.29295	1.21021e-06	4.30392e-05
PLOD2	2.69685	0.529612	1.22771e-06	4.35468e-05
IGHV1-69-2	2.02543	3.56261	1.25172e-06	4.42323e-05
SLITRK6	4.12931	0.183507	1.31268e-06	4.62201e-05
IFIT1B	2.43128	1.53796	1.34012e-06	4.70038e-05
AL773572.7	2.71176	-1.98698	1.36968e-06	4.79514e-05
RP11-119J18.1	3.3717	-3.43933	1.39099e-06	4.86523e-05
RP11-486A14.2	2.19666	-2.19333	1.3947e-06	4.87369e-05
RP11-136K14.3	2.17932	-2.70763	1.42421e-06	4.96304e-05
IGHV3-47	2.06751	-1.52974	1.43948e-06	5.01162e-05
ZNF883	2.26541	0.00522202	1.49523e-06	5.19614e-05
CADM3	2.67448	-0.954243	1.50153e-06	5.21321e-05
LOC401913	2.0635	-3.1741	1.54319e-06	5.34311e-05
MEIS2	2.73396	1.21176	1.5815e-06	5.46404e-05
LIF	2.25008	1.5116	1.63352e-06	5.6249e-05
MMP1	3.28611	-3.38661	1.64176e-06	5.63403e-05
SFRP2	2.10785	-2.25631	1.64988e-06	5.65546e-05
IGKV3-7	2.00774	-0.710262	1.68051e-06	5.75e-05
IGHV4-61	2.00778	1.47359	1.68409e-06	5.75704e-05
RNA5SP184	2.72165	-3.00553	1.70324e-06	5.81194e-05
KDR	2.33962	0.525164	1.74494e-06	5.94349e-05
C7orf62	4.55355	-3.47215	1.7491e-06	5.95229e-05
ADAMTS9-AS1	2.23578	-2.84135	1.79983e-06	6.10841e-05
AC006946.17	2.9555	-2.59773	1.84108e-06	6.23721e-05
LRRC2	2.06228	0.119879	1.94764e-06	6.56286e-05
RP11-272D12.2	2.38074	-2.94322	2.16739e-06	7.2451e-05
TNNI2	2.1097	1.68622	2.1824e-06	7.28239e-05
IGHV1OR16-1	2.32158	-2.81205	2.2749e-06	7.57096e-05
RP11-79H23.3	2.30141	-1.07857	2.45538e-06	8.10728e-05
RP4-758J18.10	2.21053	-0.334157	2.4944e-06	8.22249e-05
AC113133.2	2.48241	-2.59669	2.49463e-06	8.22249e-05
AJ006998.2	3.25756	2.65629	2.55623e-06	8.40348e-05
CACNG6	2.25209	-2.62901	2.59655e-06	8.52119e-05
OPRK1	2.36204	-1.92097	2.6073e-06	8.54903e-05
IGKV1D-12	2.15602	-1.821	2.68394e-06	8.76986e-05
DLX5	2.28936	-3.02495	2.7359e-06	8.9242e-05
ST6GALNAC3	2.00347	0.439067	2.74981e-06	8.9541e-05
BEND2	2.37336	-1.9459	2.77935e-06	9.0269e-05
ITLN1	2.25315	-0.853819	2.83553e-06	9.18564e-05
ABCB11	2.376	-1.4738	2.93837e-06	9.48625e-05
IGHV4OR15-8	2.22339	-3.19547	2.94806e-06	9.50938e-05
IGHV1-14	2.2865	-2.19772	2.95386e-06	9.51994e-05
KEL	2.05176	4.05745	2.98252e-06	9.58775e-05
RIMS1	2.4726	-2.10481	3.1088e-06	9.94288e-05
RP11-501E14.1	2.74445	-3.4667	3.1399e-06	0.000100338
NBPF6	3.10581	-2.98628	3.27666e-06	0.000104004
IGHEP1	2.34382	-3.4119	3.51414e-06	0.000110612
PARVA	2.11401	-0.338512	3.67726e-06	0.000114884
AP001189.4	2.18971	-0.878573	3.84775e-06	0.000119518
PTN	2.78827	-3.16687	3.92926e-06	0.000121649
RP11-573N10.1	2.84688	-3.43381	3.94767e-06	0.000122119
RP11-486A14.1	2.24377	-2.79715	3.96105e-06	0.000122432
NOS1AP	2.11968	1.14509	4.07312e-06	0.000125691
IGKV3D-15	2.05912	-0.626095	4.3015e-06	0.000132305
IGLJ2	2.02865	-2.30738	4.31526e-06	0.000132621
AC139099.4	2.06178	-2.96151	4.34544e-06	0.000133439
IGHV3OR16-16	2.0464	-3.38385	4.53616e-06	0.000138957
TFCP2L1	2.33282	1.12919	4.55825e-06	0.000139398
AC103563.2	2.20679	-2.13322	4.5949e-06	0.0001403
NPM1P43	2.28044	-2.99191	4.63918e-06	0.000141424
AC005477.1	3.12331	-2.51923	4.68732e-06	0.000142546
RP11-567J20.3	2.38938	-1.99457	4.69571e-06	0.000142686
IGKV1-39	2.44331	-1.08155	5.09078e-06	0.000153701
PAX9	2.14328	-2.93822	5.26258e-06	0.000157877
AC004691.1	2.07033	-3.29181	5.50079e-06	0.000164111
RP4-737E23.2	2.74714	-0.267994	5.52337e-06	0.000164654
C6	2.64567	-3.2476	5.55485e-06	0.000165331
AC009237.8	2.24677	0.0465884	5.62092e-06	0.000167034
RNASE1	2.11968	2.35566	5.74016e-06	0.000169909
AP000695.4	2.10948	-1.30094	5.75584e-06	0.000170239
ADD2	2.0405	5.09862	5.94962e-06	0.000175011
TSKU	2.02245	0.00504213	6.23757e-06	0.000182203
ARSEP1	3.08914	-3.13269	6.38612e-06	0.000185966
RP11-526P5.2	4.07269	-2.59764	6.43416e-06	0.000186789
CYP39A1	2.6394	-3.02732	6.49064e-06	0.000187994
IGHV1OR21-1	2.19042	-2.4133	6.80041e-06	0.000196386
TEX15	3.10137	1.16469	7.02915e-06	0.000202195
XXbac-BPG154L12.5	2.2411	-3.46214	7.13867e-06	0.000205033
SHROOM2	2.34074	-1.03925	7.2793e-06	0.000208913
IGKV3D-7	2.34234	-3.23816	7.5697e-06	0.000216261
RP11-313J2.1	2.50521	1.03406	7.7103e-06	0.000219447
C1QTNF1	2.0578	-0.0335418	7.71659e-06	0.00021946
KDM4E	2.95176	-1.98615	7.7441e-06	0.000220077
CTD-2270F17.1	2.35794	-0.909869	7.87693e-06	0.000223347
A4GALT	2.02889	2.09507	8.0092e-06	0.000226248
THSD7B	2.20746	-2.02119	8.04353e-06	0.000226709
VCAM1	2.40796	2.7659	8.10437e-06	0.000228083
RP11-153K16.1	3.1128	-3.43559	8.17522e-06	0.000229723
OR11L1	2.23641	-2.45794	8.18093e-06	0.000229723
MED14P1	3.84417	-2.87009	8.23319e-06	0.000231019
GKN2	2.42054	-3.38471	8.54339e-06	0.000238306
CTA-392E5.1	2.20412	-0.902996	8.66818e-06	0.000241608
MME	2.34086	2.48147	9.37758e-06	0.000259465
AC020571.3	2.03628	0.0552788	1.04413e-05	0.000284721
LINGO2	2.14595	-2.1965	1.07993e-05	0.000293213
VN1R17P	2.05348	-3.22926	1.10764e-05	0.000299443
LRRC32	2.01404	0.969247	1.1242e-05	0.000302981
RP11-1B20.1	2.64567	-2.872	1.13563e-05	0.000305697
CoTC_ribozyme	2.45126	-3.29659	1.14986e-05	0.000309306
RBPMS2	2.10376	2.59661	1.15282e-05	0.000309882
TSPEAR	2.33663	-1.18573	1.16307e-05	0.000311748
PAQR9	2.48779	0.134499	1.19064e-05	0.000318332
CDCA4P3	2.11145	-3.07832	1.191e-05	0.000318332
ZIM2-AS1	2.1299	-2.59083	1.19602e-05	0.000319221
ESRRG	2.37793	-2.39806	1.21294e-05	0.000323507
C7	2.25794	1.59727	1.21928e-05	0.00032474
RP11-1223D19.1	2.13457	-3.19349	1.22653e-05	0.00032644
RP11-328J2.1	3.27931	-2.94045	1.23422e-05	0.000327816
ENPP3	2.11116	1.30711	1.24643e-05	0.000330803
FXYD6	2.01975	3.14942	1.26303e-05	0.000334268
CLCN3P1	2.46562	-2.72177	1.27563e-05	0.000336895
CTA-363E6.6	2.30666	-0.963303	1.28352e-05	0.000338743
SYTL4	2.13688	3.29531	1.3083e-05	0.000345041
FFAR3	2.0632	-2.81663	1.30986e-05	0.000345209
CTD-2227E11.1	2.11306	-3.11117	1.31601e-05	0.000346349
SYNDIG1	2.25561	-3.02886	1.33176e-05	0.000349761
RP11-578O24.2	2.09891	-2.19285	1.33289e-05	0.000349813
CMB9-22P13.2	2.00492	-3.00655	1.35128e-05	0.000354393
RP11-535M15.1	2.05164	-1.44514	1.35479e-05	0.000355068
AC139099.7	2.31007	-3.08329	1.37454e-05	0.000359245
UTS2	2.39412	-0.677425	1.40537e-05	0.000366036
IGKV1OR2-6	2.12895	-1.70866	1.42782e-05	0.000371105
RP11-440D17.4	2.43971	-2.5502	1.43259e-05	0.000371843
H19	2.43981	0.0727169	1.46064e-05	0.000378343
CCL18	2.48306	-0.584959	1.48477e-05	0.00038354
KRT8P31	2.50526	-2.08989	1.49764e-05	0.000386071
CD109	2.16407	5.25645	1.5011e-05	0.000386699
MIR4520-1	2.04952	-3.26703	1.52434e-05	0.000391829
OLFM1	2.14672	-1.02008	1.57078e-05	0.000401362
RP11-762H8.3	2.37091	-3.14699	1.572e-05	0.000401403
IGHV1OR15-9	2.08605	-1.36276	1.60045e-05	0.000407564
HEPACAM2	2.04754	-0.592334	1.67196e-05	0.00042349
IGKV2OR2-1	2.0841	-3.33074	1.68099e-05	0.000424637
RNU6-171P	3.25822	-3.3393	1.69467e-05	0.000427518
AP001596.6	2.89805	-1.67137	1.73966e-05	0.000436825
ADH1B	2.3738	-1.84341	1.84704e-05	0.000461332
RP11-113I22.1	2.24387	-2.92525	1.92696e-05	0.00047939
LINC01254	2.11073	-3.41679	1.97512e-05	0.000489115
RP4-539M6.14	2.14623	-2.27819	1.9951e-05	0.000493092
IGKV1OR2-3	2.0935	-3.15749	2.06792e-05	0.000507765
PKHD1	2.13501	-3.16935	2.10989e-05	0.000515721
ADAMTS9	2.27331	0.56404	2.13292e-05	0.000520338
RP11-60C6.8	3.09363	-3.21515	2.21109e-05	0.000536288
LINC00470	2.90397	-1.93427	2.25682e-05	0.000545977
RP11-327P2.6	2.11118	-2.92181	2.2899e-05	0.00055221
TIMD4	2.0247	1.04639	2.3424e-05	0.00056307
LL22NC03-30E12.10	2.43271	-2.989	2.43837e-05	0.000582799
NLGN1-AS1	3.2677	-3.35842	2.49003e-05	0.000594019
CEACAM22P	2.03788	-1.87083	2.52884e-05	0.000601377
TNR	2.08637	0.122957	2.55232e-05	0.000605434
FST	2.40248	0.384466	2.6506e-05	0.000624041
ZNF676	2.17172	-1.7362	2.65577e-05	0.000624867
PF4	2.27292	2.95439	2.72322e-05	0.000638229
TSPYL5	2.11248	2.03644	2.81475e-05	0.000656543
CXCL14	2.04383	-0.7727	2.8209e-05	0.000656759
TMEM40	2.07445	-0.609117	2.83241e-05	0.000658464
TMEM108-AS1	2.44712	-3.13963	2.83694e-05	0.000658464
PTPRM	2.07315	4.23293	2.84472e-05	0.000659706
IL33	2.35568	-0.651085	2.85888e-05	0.000661928
TDO2	2.17734	-1.52381	2.8636e-05	0.000662207
NAT2	2.70323	-3.09509	2.87561e-05	0.000664172
CPN2	2.16901	-2.30906	2.8827e-05	0.000665402
LCE5A	3.25987	-3.27482	2.91972e-05	0.000673123
RP11-301G19.1	2.95179	4.19276	2.92644e-05	0.00067426
RP11-39M21.2	2.7216	-3.28923	2.93648e-05	0.000676006
KBTBD12	2.07417	0.50355	2.95089e-05	0.000678652
LINC01057	2.41703	-0.761122	3.00728e-05	0.000688264
GNG12-AS1	2.36518	-2.77147	3.17199e-05	0.000722021
LY6G6E	2.18256	-0.850293	3.18845e-05	0.000725328
MFAP2	2.03049	0.087254	3.19169e-05	0.000725538
LA16c-352F7.1	2.07289	-2.04472	3.19321e-05	0.000725538
CTD-2554C21.3	2.52918	-0.466544	3.29302e-05	0.000744773
RP11-57H12.2	2.30148	-2.53553	3.33355e-05	0.000752442
MLLT4-AS1	2.12488	-3.05626	3.38043e-05	0.000761657
FAM83B	2.75701	-1.45802	3.4535e-05	0.000774882
RP11-556I14.2	2.38906	-3.2287	3.55254e-05	0.000792393
ZBED9	2.33483	-2.30511	3.60766e-05	0.000803263
ASS1P10	2.12585	-3.37447	3.66364e-05	0.000813807
PCLO	2.50756	0.289322	3.76638e-05	0.000834663
RP11-400K9.4	2.9471	-1.58118	3.83243e-05	0.000845329
RP11-526P5.1	3.98191	-2.63222	3.89146e-05	0.000856348
RP11-10A14.9	2.1099	-2.95808	3.94915e-05	0.000867526
DMRT2	2.11762	-3.21641	3.99791e-05	0.00087518
PDE1A	2.2712	-0.0612545	4.13531e-05	0.000901598
FREM1	2.75739	2.5803	4.21251e-05	0.00091737
MAGEC3	3.83616	-2.70917	4.50604e-05	0.000973712
RP11-678G14.3	2.22419	2.4872	4.50993e-05	0.000973712
MMP13	2.64937	-2.50919	4.62976e-05	0.000995029
C6orf223	2.09665	-1.29985	4.68033e-05	0.00100257
ACTL8	2.17276	-2.82522	4.82964e-05	0.00103211
LINC01399	3.16065	-3.25182	5.11342e-05	0.0010866
AC064874.1	2.1669	-2.88716	5.1908e-05	0.00109687
TMEM246-AS1	3.85466	-3.48194	5.36654e-05	0.00112581
HIF3A	2.23449	0.910508	5.52551e-05	0.00115403
IGKV1D-33	2.27685	-2.79102	6.41452e-05	0.00130785
IBSP	2.80553	-2.8004	6.87457e-05	0.0013815
LL22NC03-30E12.13	2.62855	-2.59315	6.89598e-05	0.00138422
THRB-AS1	2.068	-2.72924	6.9676e-05	0.00139648
XXbac-BPG32J3.20	2.36957	-3.11254	7.10398e-05	0.00142004
ENTHD1	2.02099	-2.77787	7.23451e-05	0.00144155
SNHG18	2.36717	-3.19153	7.32349e-05	0.00145468
LURAP1L	2.47411	-2.17835	7.33918e-05	0.00145662
AGAP1-IT1	2.14027	-2.51463	7.3936e-05	0.00146475
HMGA2	2.3549	2.73487	7.41646e-05	0.00146774
RPH3A	2.25015	1.21477	7.436e-05	0.00147083
EGF	2.03462	1.843	7.51931e-05	0.0014842
SLC25A27	2.00769	0.894677	7.84609e-05	0.00153585
RP11-14C10.3	2.14717	-3.20429	8.06717e-05	0.00157016
MB	2.28228	-2.65915	8.48058e-05	0.00163712
SLC22A3	2.00254	0.0899331	8.48987e-05	0.00163724
RP11-170L3.7	2.1081	-2.50974	8.80318e-05	0.00168817
ZNF462	2.00752	2.06393	9.1959e-05	0.00175014
CTB-31C7.3	2.68655	-3.42738	9.41664e-05	0.0017787
ANO3	2.41002	-3.12631	9.5854e-05	0.00180606
IGKV1-33	2.06564	-2.24059	9.83137e-05	0.00183902
AC104389.16	2.17211	-3.23721	0.000102055	0.0018936
AL391001.1	3.2199	-3.15504	0.000103661	0.00191772
GABRA3	2.19051	-3.46572	0.00010827	0.00199128
AC005009.2	2.75943	-3.35895	0.000108463	0.00199387
CTD-2554C21.2	2.288	-1.19557	0.000111528	0.00203631
IGKV1D-17	2.04894	-1.5015	0.000117131	0.00211813
RP11-506O24.1	2.98461	-2.73804	0.000120789	0.00217075
PACSIN1	2.16688	3.00906	0.000122618	0.00219629
RP11-680F8.1	2.05573	-3.28502	0.000124379	0.00221941
PRKG1-AS1	2.52435	-2.54896	0.000128653	0.00227844
CTD-2332E11.2	2.0522	-2.9042	0.000132428	0.00233053
PEG3	2.19617	-0.424196	0.000134661	0.00236488
FAM155B	2.81458	0.0298387	0.000141227	0.00245392
MAGI2-AS3	2.08274	1.82381	0.000141382	0.00245548
LY6G6F	2.05787	-1.56071	0.000143452	0.00248343
RP4-735C1.6	2.45092	-2.60976	0.000144374	0.00249596
PLSCR4	2.13837	1.79554	0.000146431	0.00252343
NR2F2	2.04452	-0.138646	0.000151969	0.00260814
TMEM132C	2.02856	-0.867897	0.000154808	0.00264603
C14orf39	2.09271	-3.19358	0.000158622	0.0027051
LSAMP	2.03314	1.46243	0.00016568	0.00280393
AL391001.2	3.17161	-3.28335	0.000168555	0.00284111
RP11-826F13.1	2.47328	-3.0381	0.000171442	0.00287949
PPFIA2	2.07339	-2.6907	0.000177408	0.00296255
STC2	2.09528	-1.90565	0.000181286	0.00301797
ADIPOQ	2.27002	-1.83501	0.000186536	0.00308495
CD5L	2.19197	0.86819	0.000188632	0.00311416
RP11-554D20.2	2.7266	-3.1107	0.000201609	0.00328379
TMEM98	2.07932	0.256478	0.000208782	0.00338029
AC067959.1	3.1297	-3.06781	0.000209957	0.00339061
KANK4	2.17388	-1.82521	0.00021725	0.0034845
SLC44A3	2.23791	-0.0765101	0.000220277	0.00352107
CHRDL1	2.27559	3.13861	0.000244554	0.00381699
HRASLS	2.76386	-2.57422	0.000244801	0.00381926
AC091878.1	2.07314	-1.73604	0.000247156	0.00384805
TRHDE	2.2424	-1.77541	0.000253867	0.00393467
CTC-228N24.2	2.54552	-3.37841	0.000255828	0.00396019
GPC6	2.76	1.97416	0.000272622	0.00416718
AC009237.11	2.21833	-2.52201	0.000273797	0.00418344
ZSCAN1	2.2069	-1.4324	0.000274867	0.0041947
IGKV1D-13	2.0278	8.95905e-05	0.000277322	0.00422022
RP11-537P22.2	2.07244	-3.00501	0.000283032	0.00428065
SLC25A24P1	2.90255	-1.64893	0.000283471	0.00428277
RP11-162D9.3	2.17965	-3.22767	0.000283475	0.00428277
NFYAP1	3.4919	-0.246383	0.00029477	0.00441103
SOSTDC1	2.27311	0.715222	0.000307259	0.00456174
AF246928.1	3.25127	-3.10838	0.000311644	0.00461234
UGT3A1	2.36789	-2.56185	0.000326536	0.00479512
VWDE	2.31761	2.28377	0.000327391	0.00480394
RP11-384P7.7	2.09791	1.14893	0.000336711	0.0049292
RP3-523K23.2	2.36597	-2.76349	0.00033871	0.00494631
RP11-391H12.8	2.47139	-1.97149	0.00036813	0.00529088
RP11-495K9.2	2.17316	-3.20449	0.000373892	0.00536323
TPSG1	2.03401	-1.34125	0.000377131	0.0053933
TUSC3	2.06376	-1.24554	0.000389266	0.00553538
NPAP1P6	2.55293	-2.96742	0.000418593	0.00587931
RP11-446F3.2	3.59372	-2.75001	0.00049374	0.00666442
SMIM2-IT1	2.51804	-2.60011	0.000498423	0.00671564
RP11-129M6.1	3.53825	-2.92346	0.000511893	0.00685747
RP11-32A1.2	3.05769	-3.44241	0.000512009	0.00685747
ADAMTS3	2.13769	2.46965	0.000520075	0.00694462
RP5-875O13.7	2.04827	-2.48367	0.000527057	0.00700639
COL3A1	2.05214	2.44948	0.00056275	0.00737181
VN1R78P	2.066	-2.86852	0.000579189	0.00754786
RP4-735C1.4	2.09002	-3.23226	0.000629815	0.00805737
FAM181B	2.02975	-2.91284	0.000748703	0.00923703
CCL8	2.17536	-2.749	0.00080172	0.00976344
OR2A4	2.02117	-3.08243	0.000864843	0.0103191
RP3-333A15.2	2.50681	-3.18635	0.000888307	0.0105457
LINC01360	2.51046	-3.40591	0.000924297	0.0108771
SSTR1	2.06185	-3.10034	0.00105267	0.0120595
CYYR1-AS1	2.49054	-0.342184	0.00108752	0.0123735
RP11-94M14.2	2.41089	-3.41648	0.00114762	0.0128979
ISX	2.07322	-3.2298	0.0011558	0.0129551
SPIC	2.01093	-1.88132	0.00124786	0.0136982
UNC5D	2.11859	-3.08395	0.00132438	0.0143626
TDRG1	2.11447	-3.33345	0.00135176	0.0145841
RP11-506O24.2	2.56729	-3.29892	0.00136708	0.01472
RP11-384F7.2	2.97484	-2.01522	0.0016196	0.0166731
OR1N1	2.04792	-3.3331	0.00163876	0.0168037
RP11-768G7.2	2.52214	-2.34184	0.00167929	0.0171149
TSPEAR-AS1	2.05608	-0.523988	0.00170791	0.0173038
CLVS2	2.31279	-3.20539	0.00177657	0.0177845
FGF16	2.06402	-1.77913	0.00183951	0.0182933
CHRM3	2.01842	1.51654	0.00193435	0.0189912
BGLT3	2.14734	-0.660186	0.00201027	0.0195411
TRBV26OR9-2	2.15781	-1.80006	0.002055	0.0198657
SCGN	2.39704	-3.43741	0.00214211	0.0204926
DCAF13P2	2.06582	-3.24394	0.00226428	0.021398
LINC00323	2.38627	-2.81454	0.00242638	0.0225103
GABRQ	2.06778	-1.55043	0.00248074	0.0228864
LINC00701	2.96482	-3.41678	0.00253428	0.0232371
MIR598	2.00733	-3.42576	0.00284228	0.0252751
UGT2A1	2.67245	-2.76492	0.00292062	0.0257955
ADGRB3	2.03279	-0.992102	0.00295051	0.0259846
RP11-529J17.3	2.05974	-3.31874	0.00297923	0.0261358
RP11-5N11.3	2.07804	-3.41073	0.0030055	0.0263234
TDRD15	2.26777	-1.29564	0.00305628	0.0266322
LINC01602	2.56166	-2.22872	0.00327331	0.0279491
RP3-514A23.2	2.25873	-3.47367	0.00411616	0.0329258
ZIM2	2.09271	-2.73629	0.00417571	0.0332297
TUSC7	2.33462	-2.4822	0.00423019	0.0335323
C7orf72	2.04955	-3.04574	0.00424611	0.0336166
NKAIN2	2.07851	1.38367	0.00467787	0.0359712
AC011752.1	2.42227	-3.16522	0.00467893	0.0359712
CTD-2342I9.1	2.01249	-1.88355	0.00507079	0.0382361
RP11-115E19.1	2.91127	-3.16198	0.00559212	0.0409005
LINC00901	2.45208	-3.28793	0.00611043	0.0436591
RP11-768G7.1	2.67302	-2.64882	0.00638779	0.0451452
CNBD1	2.30348	-2.00824	0.00644889	0.0454069
ST6GAL2-IT1	2.6209	-3.44057	0.00675359	0.0469739

## Sheet: Table S3
Category	Term	Count	%	PValue	Genes	List Total	Pop Hits	Pop Total	Fold Enrichment	Bonferroni	Benjamini	FDR
GOTERM_BP_DIRECT	GO:0050911~detection of chemical stimulus involved in sensory perception of smell	7	33.3333	2.53929e-10	OR13C3, OR2A4, OR11L1, OR13F1, OR1N1, OR13C9, OR13C8	7	425	16792	39.5106	2.28536e-09	2.28536e-09	1.46136e-07
GOTERM_MF_DIRECT	GO:0004984~olfactory receptor activity	7	33.3333	2.6772e-10	OR13C3, OR2A4, OR11L1, OR13F1, OR1N1, OR13C9, OR13C8	7	431	16881	39.1671	1.07088e-09	1.07088e-09	1.02217e-07
GOTERM_MF_DIRECT	GO:0004930~G-protein coupled receptor activity	7	33.3333	5.42435e-09	OR13C3, OR2A4, OR11L1, OR13F1, OR1N1, OR13C9, OR13C8	7	710	16881	23.7761	2.16974e-08	1.08487e-08	2.07106e-06
GOTERM_BP_DIRECT	GO:0007186~G-protein coupled receptor signaling pathway	6	28.5714	2.49541e-06	OR13C3, OR2A4, OR11L1, OR1N1, OR13C9, OR13C8	7	899	16792	16.0102	2.24585e-05	1.12293e-05	0.0014361
GOTERM_CC_DIRECT	GO:0005886~plasma membrane	7	33.3333	0.00013333	OR13C3, OR2A4, OR11L1, OR13F1, OR1N1, OR13C9, OR13C8	7	4121	18224	4.42223	0.00119933	0.00119933	0.0767074
GOTERM_CC_DIRECT	GO:0016021~integral component of membrane	7	33.3333	0.000515995	OR13C3, OR2A4, OR11L1, OR13F1, OR1N1, OR13C9, OR13C8	7	5163	18224	3.52973	0.00463438	0.00231988	0.296591
GOTERM_BP_DIRECT	GO:0007608~sensory perception of smell	3	14.2857	0.00130351	OR13C3, OR13C9, OR13C8	7	159	16792	45.2615	0.0116706	0.00390544	0.747851
GOTERM_BP_DIRECT	GO:0050907~detection of chemical stimulus involved in sensory perception	2	9.52381	0.0334732	OR2A4, OR1N1	7	95	16792	50.5023	0.26392	0.0737434	17.7935
GOTERM_MF_DIRECT	GO:0004888~transmembrane signaling receptor activity	2	9.52381	0.0737022	OR2A4, OR1N1	7	214	16881	22.5381	0.263789	0.0970421	25.3463
